# Supplementary material for: Making practical use of the pseudo-element concept: an efficient way to ternary intermetalloid clusters by an isoelectronic Pb−–Bi combination
Source: Royal Society of Chemistry journal article supplement (doi:10.1039/c2cc35318k), 2012-01-01
Supplement: c2cc35318k.pdf [file c2cc35318k.pdf]

## Supporting Information

### Making practical use of the *pseudo*-element concept: an efficient way to ternary intermetalloid clusters by an isoelectronic Pb<sup>-</sup>/Bi combination

Rodica Ababei,<sup>a</sup> Johanna Heine,<sup>a</sup> Małgorzata Hołyńska,<sup>a</sup> Günther Thiele,<sup>a</sup> Bastian Weinert,<sup>a</sup> Xiulan Xie,<sup>a</sup> Florian Weigend,<sup>b</sup> and Stefanie Dehnen\*<sup>a</sup>

<sup>a</sup> Fachbereich Chemie, Wissenschaftliches Zentrum für Materialwissenschaften, Philipps-Universität Marburg, Hans-Meerwein-Straße, D-35043 Marburg, Germany, email: dehnen@chemie.uni-marburg.de; <sup>b</sup> Karlsruher Institut für Technologie (KIT), Institut für Nanotechnologie, Hermann-von-Helmholtz-Platz 1, 76344 Eggenstein-Leopoldshafen, Germany

#### Contents:

1. *Synthesis details*
2. <sup>207</sup>Pb NMR spectroscopy
3. *Single crystal X-ray crystallography*
4. *Electrospray Ionization Mass Spectrometry (ESI-MS) Investigations*
5. *Energy dispersive X-ray spectroscopy (EDX analyses)*
6. *Powder X-ray diffraction*
7. *Infrared spectroscopy (IR)*
8. *Quantum chemical methods*
9. *References for the Supporting Information*

## 1. Synthesis details

**General:** All manipulations and reactions were performed under dry argon or nitrogen atmosphere and the absence of light using standard Schlenk or glovebox techniques. Metallic films are obtained under daylight owing to photochemical decomposition; therefore, upon several unsuccessful attempts to gain the desired products, the Schlenk tubes have been generally wrapped in aluminum foil, which served to receive crystalline products in good yields. All solvents were dried and freshly distilled prior to use. [2.2.2]crypt<sup>1a</sup> (Cryptofix, Merck) was dried in vacuum for 13 h. Ni(cod)<sub>2</sub> was synthesized according to the literature<sup>1b</sup> and ZnPh<sub>2</sub> (Acros Organics, 95%) was dried in vacuum for 13 h.

**Syntheses of K(Pb,Bi)<sub>2</sub>:** K(Pb,Bi)<sub>2</sub> was prepared by fusion of stoichiometric amounts of the elements at 970°C for 2 days in a sealed niobium tube, enclosed in a fused silica jacket that was in turn evacuated and flame-sealed. Upon this procedure, the sample was water-quenched. The resulting compound is dark gray and brittle, but shiny with metallic luster. The product was pulverized inside a glove-box.

**Syntheses of [K([2.2.2]crypt)]<sub>2</sub>[Pb<sub>2</sub>Bi<sub>2</sub>]*en* (1):** The as-prepared K(Pb,Bi)<sub>2</sub> phase (500 mg, 1.098 mmol) and [2.2.2]crypt (500 mg, 1.328 mmol) were transferred into a Schlenk tube. At room temperature 25 mL of ethane-1,2-diamine (*en*) were added. The mixture was allowed to stir for 1 h, and the readily obtained reddish brown mixture was left to stand for 12 hours. The solution was decanted from the alloy residue, and large dark reddish brown plate crystals of **1** (710 mg, 0.412 mmol, 75% based on Pb) were grown by slow evaporation under reduced pressure. Energy-dispersive X-ray (EDX) spectroscopy analyses of several crystals confirmed the composition of **1** (see below).

**Syntheses of [K([2.2.2]crypt)]<sub>2</sub>[Pb<sub>7</sub>Bi<sub>2</sub>]*1.36en* (2):** Compound **2** was prepared in a similar reaction as compound **1**, followed by a different crystallization technique. After filtration through a standard glass frit, the resulting solution was layered by toluene. After 48 h, black plate crystals of **2** formed at the wall of the Schlenk tube in lower yield (150 mg, 0.054 mmol, 34% based on Pb) as in the case of **1**. EDX analyses of several crystals confirmed the composition of **2** (see below).

**Syntheses of [K([2.2.2]crypt)]<sub>3</sub>[Ni<sub>2</sub>Pb<sub>7</sub>Bi<sub>5</sub>]*2en·2tol* (3):** 204 mg (0.125 mmol) of [K(2.2.2-crypt)]<sub>2</sub>[Pb<sub>2</sub>Bi<sub>2</sub>]*en* were dissolved in *en* (3 mL), resulting in a dark reddish-brown solution. 44 mg (0.163 mmol) of Ni(cod)<sub>2</sub> were suspended in *en* (1 mL), whereupon a yellow suspension was obtained. The suspension was added to the solution while stirring vigorously. The reaction mixture was allowed to stir for 3 hours. It was then filtered through a standard glass frit, and the resulting, reddish brown solution was carefully layered with toluene (*tol*, 4

mL). After 2 days, dark brown plates of **3** crystallized at the wall of the Schlenk tube in approximately 95 mg yield (0.023 mmol, 64% based on Pb). EDX analyses of several crystals confirmed the composition of **3** (see below).

**Syntheses of  $[K([2.2.2]crypt)]_4[Zn@Zn_5Pb_3Bi_3@Bi_5]$  (**4**):** 204 mg (0.125 mmol) of  $[K(2.2.2-crypt)]_2[Pb_2Bi_2] \cdot en$  were dissolved in *en* (3 mL), resulting in a dark reddish-brown solution. 33 mg (0.150 mmol)  $ZnPh_2$  were suspended in *en* (1 mL), whereupon a colorless suspension was obtained. The suspension was added to the solution while stirring vigorously. The reaction mixture was allowed to stir for 3 hours. It was then filtered through a standard glass frit, and the resulting, reddish brown solution was carefully layered with toluene (*tol*, 4 mL). After 2 days, black plate-like crystals of **4** crystallized at the wall of the Schlenk tube in approximately 75 mg yield (0.017 mmol, 55% based on Bi). EDX analyses of several crystals confirmed the composition of **4** (see below).

## 2. $^{207}Pb$ NMR spectroscopy

**Methods:** Single crystals of **1** were dissolved in *en* or DMF under inert gas and the NMR tube was sealed.  $^{207}Pb$  NMR spectra in *en* were recorded at 25 °C on a Bruker Avance 500 spectrometer, operating at 104.6 MHz. The spectrometer is equipped with a 5 mm BBO probe with z-gradient.  $^{207}Pb$  NMR studies in DMF were performed at variable temperatures on a Bruker 400 spectrometer operating at 83.67 MHz. A Bruker standard single pulse sequence was used. In order to define the resonance signal, several spectra with a spectral width of 800 ppm were first recorded to cover the whole chemical shift range (−6000 to +6000 ppm). The final spectrum was acquired with a spectral width of 400 ppm, a typical relaxation delay of 0.3 s, and 160 000 to 240 000 scans. A typical experiment time was about 20 hours. The chemical shift of  $^{207}Pb$  was referenced to  $Me_4Pb$  ( $\delta = 0.0$  ppm) and the spectra were processed with Bruker Topspin 3.0.

**Results:** One broad peak was observed at −3861 ppm ( $K(Pb,Bi)_2$ ) or −3875 ppm (**1**, Figure S1), with line widths of  $\Delta\nu_{1/2} = 2100$  Hz or 2135 Hz at 25 °C. The observed signals are almost ten times as broad as those of two other known lead clusters  $[NiPb_{10}]^{2-}$  ( $\Delta\nu_{1/2} = 280$  Hz) and  $[PtPb_{12}]^{2-}$  ( $\Delta\nu_{1/2} = 198$  Hz) at similar temperature.<sup>2</sup> We dedicate the observed slight difference of the chemical shift (14 ppm) and the signal width (35 Hz) as deriving from a slightly different ratio of the various species that form the dynamic equilibrium in solution, since much larger differences in the chemical shifts are expected if the solutions contain different species (c.f. a chemical shift of 1167 or −996 ppm for  $[Ni@Pb_{12}]^{2-}$  or  $[Ni@Pb_{10}]^{2-}$ , respectively).<sup>2</sup>

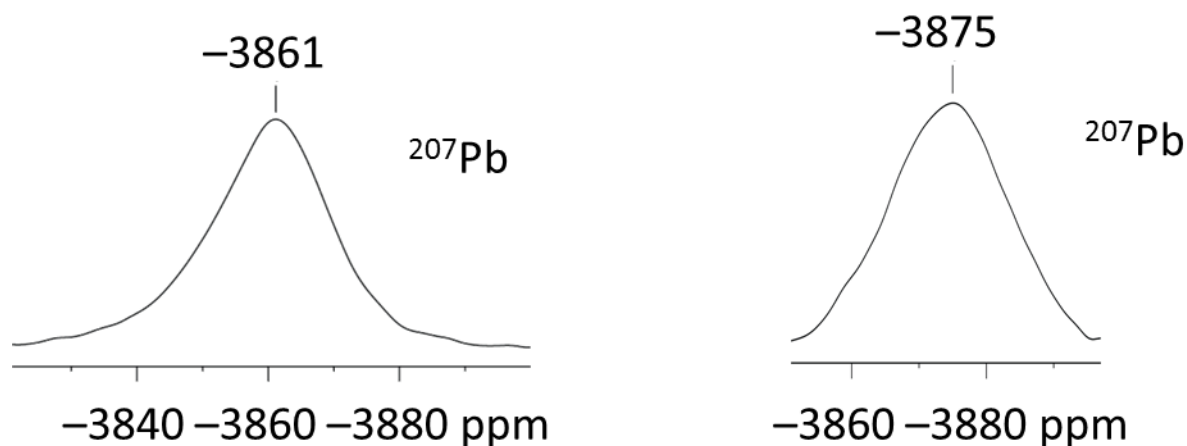

**Figure S1.**  $^{207}\text{Pb}$  NMR signal of a solution of the  $\text{K}(\text{Pb,Bi})_2$  alloy (left) and single crystals of **1** in *en* (right).

Measurements in DMF at 25, 5, and  $-15^\circ\text{C}$  result in line widths of 3800, 3000, and 1800 Hz. A slight difference in the  $^{207}\text{Pb}$  chemical shift was also observed between the two solvents, which is subject to a currently undertaken, more comprehensive investigation on solvent effects at binary Pb/Bi anions.

Attempts to record NMR spectra at elevated temperature ( $60^\circ\text{C}$ ) in *en* caused the sample to decompose. Attempts to receive NMR data of compounds **3** and **4** have not been successful – possibly due a variety of different species/fragments in solution in combination with different types of Pb atoms.

### 3. Single crystal X-ray crystallography

Data of the X-ray diffraction analyses:  $T = 100(2)$  K,  $\text{MoK}_\alpha$ -radiation ( $\lambda_{\text{Mo-K}\alpha} = 0.71073 \text{ \AA}$ ), graphite monochromator, imaging plate detector system STOE IPDS2T. Structure solution by direct methods, full-matrix-least-squares refinement against  $F^2$ ; software used SHELXL-97.<sup>3a</sup> Table **S1** summarizes data collection and refinement details. Graphics were generated by using Diamond 3 software.<sup>3b</sup>

**Table S1.** X-ray data collection, structure solution and refinement data of **1 - 4**.

| Compound                                           | <b>1</b>                                                                                                      | <b>2</b>                                                                                                               | <b>3</b>                                                                                                                        | <b>4</b>                                                                                                                       |
|----------------------------------------------------|---------------------------------------------------------------------------------------------------------------|------------------------------------------------------------------------------------------------------------------------|---------------------------------------------------------------------------------------------------------------------------------|--------------------------------------------------------------------------------------------------------------------------------|
| Empirical formula                                  | C <sub>38</sub> H <sub>80</sub> O <sub>12</sub> N <sub>6</sub> K <sub>2</sub> Pb <sub>2</sub> Bi <sub>2</sub> | C <sub>38.63</sub> H <sub>74.72</sub> Bi <sub>2</sub> K <sub>2</sub> N <sub>6.63</sub> O <sub>12</sub> Pb <sub>7</sub> | C <sub>72</sub> H <sub>124</sub> Bi <sub>3</sub> K <sub>3</sub> N <sub>10</sub> Ni <sub>2</sub> O <sub>18</sub> Pb <sub>7</sub> | C <sub>72</sub> H <sub>144</sub> Bi <sub>8</sub> O <sub>24</sub> K <sub>4</sub> N <sub>8</sub> Zn <sub>6</sub> Pb <sub>3</sub> |
| Formula weight /g·mol <sup>-1</sup>                | 1723.62                                                                                                       | 2770.64                                                                                                                | 4147.76                                                                                                                         | 4347.98                                                                                                                        |
| Crystal color, shape                               | reddish brown, plate                                                                                          | black, plate                                                                                                           | dark brown, plate                                                                                                               | black, plate                                                                                                                   |
| Crystal size /mm <sup>3</sup>                      | 0.12 × 0.05 × 0.04                                                                                            | 0.03 × 0.10 × 0.16                                                                                                     | 0.09 × 0.16 × 0.19                                                                                                              | 0.25 × 0.14 × 0.01                                                                                                             |
| Crystal system                                     | monoclinic                                                                                                    | hexagonal                                                                                                              | monoclinic                                                                                                                      | triclinic                                                                                                                      |
| Space group                                        | <i>P</i> 2 <sub>1</sub>                                                                                       | <i>P</i> 6 <sub>3</sub> / <i>m</i>                                                                                     | <i>C</i> 2/ <i>c</i>                                                                                                            | <i>P</i> -1                                                                                                                    |
| <i>a</i> /Å                                        | 12.158(3)                                                                                                     | 12.212(3)                                                                                                              | 29.707(5)                                                                                                                       | 18.463(4)                                                                                                                      |
| <i>b</i> /Å                                        | 20.619(4)                                                                                                     |                                                                                                                        | 13.204(3)                                                                                                                       | 28.665(5)                                                                                                                      |
| <i>c</i> /Å                                        | 12.581(3)                                                                                                     | 26.414(4)                                                                                                              | 28.242(4)                                                                                                                       | 28.935(5)                                                                                                                      |
| <i>α</i> /°                                        |                                                                                                               |                                                                                                                        |                                                                                                                                 | 62.70(3)                                                                                                                       |
| <i>β</i> /°                                        | 118.92(3)                                                                                                     |                                                                                                                        | 107.24(3)                                                                                                                       | 88.33(3)                                                                                                                       |
| <i>γ</i> /°                                        |                                                                                                               |                                                                                                                        |                                                                                                                                 | 71.68(3)                                                                                                                       |
| <i>V</i> /Å <sup>3</sup>                           | 2761(2)                                                                                                       | 3411(2)                                                                                                                | 10580(3)                                                                                                                        | 12798(4)                                                                                                                       |
| <i>Z</i>                                           | 2                                                                                                             | 2                                                                                                                      | 4                                                                                                                               | 4                                                                                                                              |
| <i>ρ</i> <sub>calc</sub> /g·cm <sup>-3</sup>       | 2.074                                                                                                         | 2.697                                                                                                                  | 2.604                                                                                                                           | 2.257                                                                                                                          |
| <i>μ</i> (MoK <sub>α</sub> ) /mm <sup>-1</sup>     | 12.64                                                                                                         | 22.51                                                                                                                  | 19.90                                                                                                                           | 16.17                                                                                                                          |
| 2θ range /°                                        | 3.82-58.52                                                                                                    | 3.08-49.98                                                                                                             | 3.02-50.00                                                                                                                      | 3.02-58.46                                                                                                                     |
| Reflections measured                               | 16860                                                                                                         | 21763                                                                                                                  | 39809                                                                                                                           | 106680                                                                                                                         |
| Independent reflns, <i>R</i> (int)                 | 12203, 0.1494                                                                                                 | 2018, 0.1708                                                                                                           | 9268, 0.1580                                                                                                                    | 63556, 0.1981                                                                                                                  |
| Independent reflns ( <i>I</i> > 2σ( <i>I</i> ))    | 6596                                                                                                          | 1347                                                                                                                   | 5642                                                                                                                            | 11163                                                                                                                          |
| Parameters                                         | 559                                                                                                           | 128                                                                                                                    | 431                                                                                                                             | 1789                                                                                                                           |
| Restraints                                         | 73                                                                                                            | 4                                                                                                                      | 13                                                                                                                              | 825                                                                                                                            |
| <i>R</i> <sub>1</sub> ( <i>I</i> > 2σ( <i>I</i> )) | 0.0841                                                                                                        | 0.0571                                                                                                                 | 0.0730                                                                                                                          | 0.0884                                                                                                                         |
| <i>wR</i> <sub>2</sub> (all data)                  | 0.1893                                                                                                        | 0.1520                                                                                                                 | 0.1298                                                                                                                          | 0.1739                                                                                                                         |
| <i>Goof</i> (all data)                             | 1.004                                                                                                         | 1.023                                                                                                                  | 1.043                                                                                                                           | 0.867                                                                                                                          |
| <i>Flack</i> <sup>3c</sup>                         | 0.02(2)                                                                                                       | –                                                                                                                      | –                                                                                                                               | –                                                                                                                              |
| Max. peak / hole /e·Å <sup>-3</sup>                | 2.09 / -3.82                                                                                                  | 1.21 / -1.55                                                                                                           | 1.69 / -1.73                                                                                                                    | 2.94 / -2.10                                                                                                                   |
| Absorption correction type <sup>3d</sup>           | numerical                                                                                                     | numerical                                                                                                              | numerical                                                                                                                       | gaussian                                                                                                                       |
| Min. / max. transmission                           | 0.337 / 0.702                                                                                                 | 0.054 / 0.454                                                                                                          | 0.070 / 0.768                                                                                                                   | 0.164 / 0.618                                                                                                                  |

### 3.2 Details of the structure refinements:

Where possible, H atoms were placed in calculated positions and treated with a riding model.

**Compound C<sub>38</sub>H<sub>80</sub>O<sub>12</sub>N<sub>6</sub>K<sub>2</sub>Pb<sub>2</sub>Bi<sub>2</sub> (1):** The structure of **1** was solved in the non-centrosymmetric space group *P*2<sub>1</sub>. As for the isomorphous compound comprising the homologue anion [Sn<sub>2</sub>Bi<sub>2</sub>]<sup>2-</sup>, attempts to switch it into a centrosymmetric space group result in chemically unreasonable models. For the cluster anion, occupational disorder was assumed with each atom site occupied by Pb/Bi (constrained half-occupancies and EXYZ/EADP constraints used). ISOR restraints were applied to selected light atoms (O4, C4, C29, C25, C9, C8, C35, O7, C32, C3, C26, C13). On the final difference Fourier map, the highest maximum of 2.09 e/Å<sup>3</sup> is located at 1.35 Å from Bi4. Figure S2 shows the packing of cations and anions in the crystal structure of compound **1**.

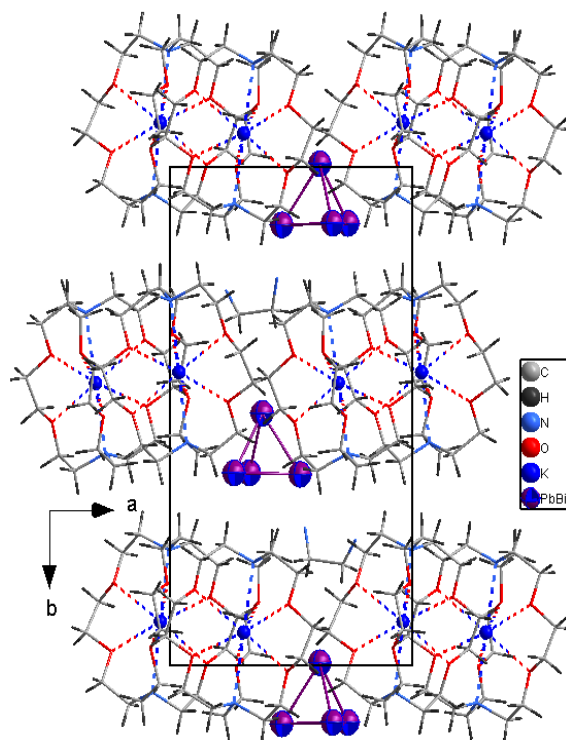

**Figure S2.** Packing of anions and cations in the crystal structure of compound **1**, viewed along the crystallographic *c*-axis. Selected distances within the anion (see Figure 1 in the main manuscript) [pm]: Pb/Bi–Pb/Bi 3.013(2)–3.048(2) Å.

**Compound**  $C_{38.63}H_{74.72}Bi_2K_2N_{6.63}O_{12}Pb_7$  (**2**): The structure of **2** was solved in the non-centrosymmetric space group  $P6_3$  and subsequently switched to  $P6_3/m$ . A careful check for the possibility of merohedral twinning was carried out. In the resulting structure model, two symmetry-independent heavy metal atom (Pb/Bi) positions were found. One position is general, the latter is of *m* (Wyckoff symbol  $6h$ ) site symmetry. Taking into account the results of further analyses (Pb:Bi = 7:2) and the space group symmetry operations, the only possible assignment is Pb for the general position and Pb/Bi with 0.167 and 0.333 occupancies for the special position. The Pb atom on the general position had to be split into two half-occupancy components during further refinement cycles. The complex  $[K([2.2.2]crypt)]^+$  cation lies on a special position (three-fold axis). The remaining content includes heavily disordered ethylenediamine molecules occupying two sites. In both cases, the molecules are disordered with respect to a three-fold axis, lying on special or general positions. For one molecule, the occupancy refined to 0.6(2), for the second molecule the occupancy was refined and then fixed at 0.2. C–N and C–C bond lengths were fixed at 1.40(5)/1.54(5) or 1.40(7)/1.54(7) Å values, respectively, by means of the corresponding DFIX restraints. For N3N/C3N, an EADP constraint was used. On the final difference Fourier map, the highest peak of 1.21 e/Å<sup>3</sup> is located at 1.18 Å from Pb1. Figure S3 shows the packing and molecular structure of **2**.

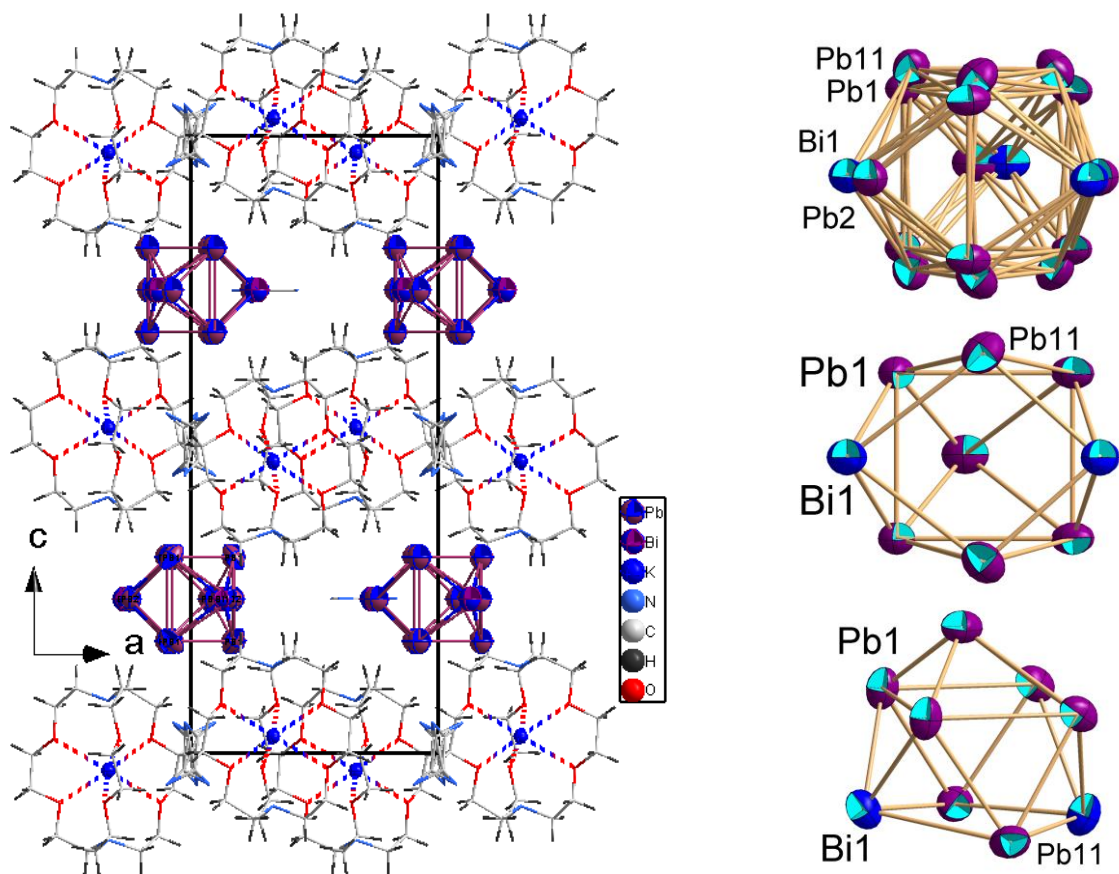

**Figure S3.** Packing of anions (without disorder) and cations in the crystal lattice of compound **2**, viewed along the crystallographic *b*-axis (left); illustration of the disorder (top right) and one of the possible rotational orientations in two different viewing directions (center and bottom right). Selected bonding distances within the anion [pm]: Pb/Bi–Pb 2.605(5)–3.379(4) Å.

**Compound  $C_{72}H_{124}Bi_5K_3N_{10}Ni_2O_{18}Pb_7$  (3):** The structure of compound **3** was solved in the monoclinic space group *C2/c*. Pb/Bi sites in the cluster anion seem to be affected by occupational disorder. Occupancies of the Pb/Bi disorder components were refined as free variables with careful manual control using EXYZ/EADP constraints. Subsequently, the refined occupancies were constrained. ISOR restraints were applied to C25 and C15 light atoms. DFIX/anti-bumping DFIX restraints were applied to the selected interatomic distances in solvent molecules. On the final difference Fourier map, the highest peak of  $1.69 \text{ e}/\text{\AA}^3$  is located at  $1.27 \text{ \AA}$  from Pb5. See Figure S4 for the packing of cations and anions in **3**.

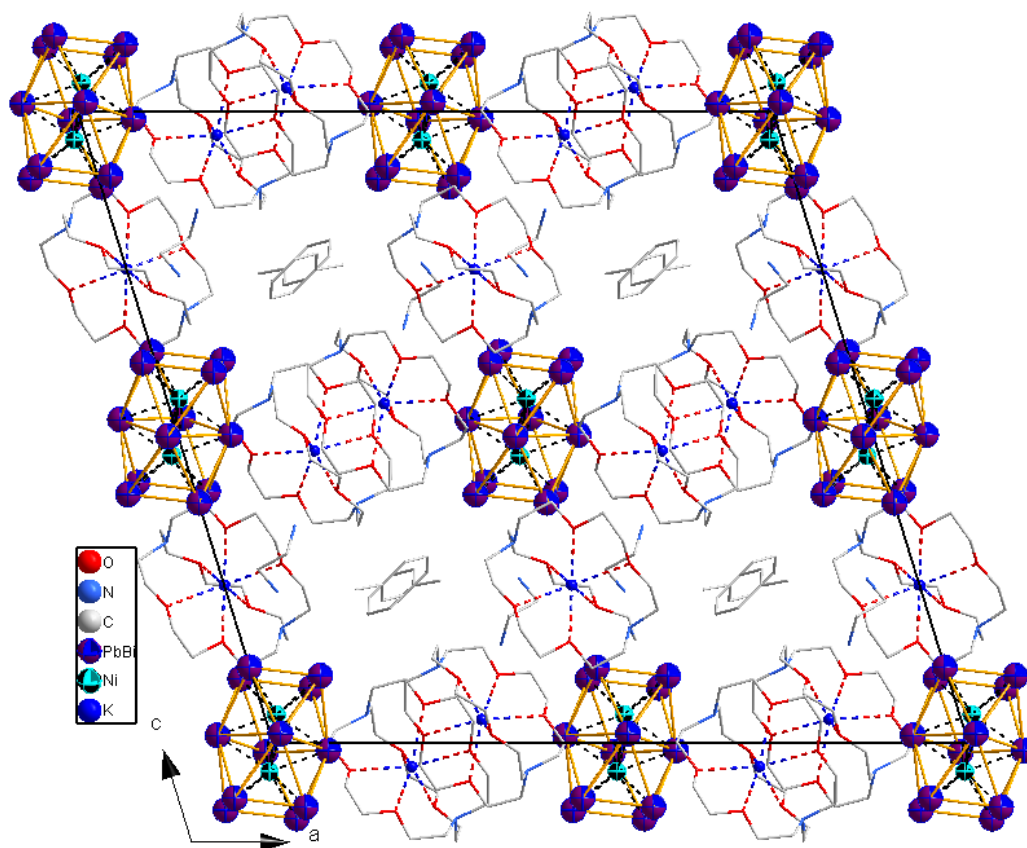

**Figure S4.** Packing of anions and cations in **3**, viewed along the crystallographic *b*-axis. H atoms of [2.2.2]crypt/solvent molecules are omitted for clarity. Selected distances within the anion (see Figure 2 in the main manuscript) [pm]: Pb/Bi1/2–Pb/Bi1/2 342.9(2)–337.2(3), Pb/Bi3-6–Pb/Bi3-6 305.8(2)–307.3(2), Pb/Bi1/2–Pb/Bi3-6 333.3(2)–337.7(2), Ni–Pb/Bi 269.9(3)–272.0(3), Ni–Ni 249.9(7).

**Compound  $C_{72}H_{144}Bi_8O_{24}K_4N_8Zn_6Pb_3$  (**4**):** The structure of compound **4** was solved in the triclinic space group  $P\bar{1}$ . Problems with data quality/completeness had to be faced, which is not uncommon for the crystal structures of this class of compounds. A substitutional disorder was introduced in the pentagonal face of the  $[Pb_3Bi_8Zn_6]^{4-}$  cluster, constraining the occupancies of Bi/Pb on each of the five positions at 0.4/0.6, respectively, to reflect the results of EDX and ESI-MS measurements. The overall low quality of the diffraction data for this compound made it necessary to refine the atomic positions and displacement parameters of the  $[K([2.2.2]crypt)]^+$  cations using a large number of restraints to maintain reasonable values of geometric parameters. The applied restraints include ISOR, DFIX/anti-bumping DFIX for C–C, C–O, C...K, C–N bond lengths/interatomic distances. Due to the difficulties in refining the light atom part of the structure, the spurious electron densities of heavily disordered solvent molecules were extracted using the SQUEEZE<sup>4</sup> algorithm. On the final difference Fourier map, the highest peak of  $2.94 e/\text{\AA}^3$  is located at  $1.68 \text{\AA}$  from Bi8. Figure S5 shows the packing of cations and anions of compound **4**, viewed along the crystallographic *c*-axis.



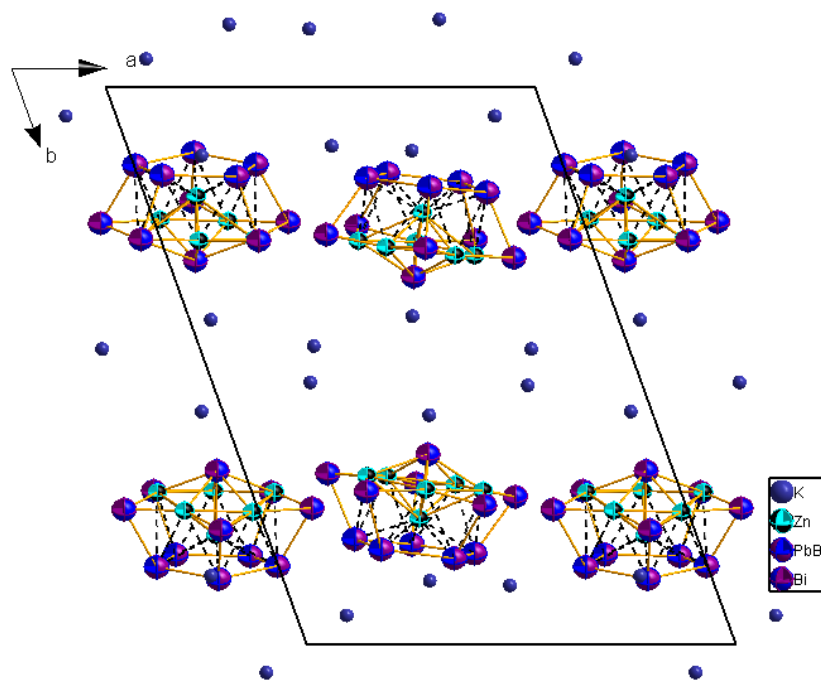

**Figure S5.** Packing of anions and cations in **4** viewed along the crystallographic *c*-axis. O, N, C and H atoms of the cations have been omitted for clarity. Selected distances within the anion (see Figure 2 in the main manuscript) [pm]: Bi1-5-Pb/Bi7-11 301.4(3)-306.5(3), Pb/Bi7-11-Pb/Bi7-11 313.7(3)-321.9(2), Bi1-5-Zn 268.5(5)-272.3(5), Pb/Bi7-11-Zn 318.5(6)-345.2(5), Bi6-Zn 279.0(5)-300.5(6), Zn-Zn 292.6(6)-325.4(7).

#### 4. Electrospray Ionization Mass Spectrometry (ESI-MS) Investigations

ESI-MS has been performed on a Finnigan LTQ-FT spectrometer by Thermo Fischer Scientific in the negative ion mode: Spray voltage 3.90 kV, capillary temperature 300°C, capillary voltage -11 V, tube lens voltage -140.38 V, sheath gas flow rate 25 arb, sweep gas flow rate 0 arb.

##### 4.1 ESI-MS Investigations of binary Pb/Bi anions

**Investigation in ethane-1,2-diamine (*en*, positive ion mode):** For *en* solutions of the as-prepared  $K(\text{Pb,Bi})_2$  phase, an ESI-MS spectrum was recorded in positive ion mode after 3 hours (Figure S6). The most prominent peaks belong to the  $[\text{Bi}_2]^-/[\text{Pb}_1\text{Bi}_1]^-$  mixture at  $m/z = 416.95$  and  $417.96$  (not shown in Figure S6). At relative intensities of up to 3%, one can assign higher  $m/z$  signals to different kinds of species with 9 or 10 atoms. Apparently, in this solvent the original cages undergo fragmentation and re-organization into other species; this may be due to an intrinsic dynamic process in solution, or to the harsh ESI-MS conditions.

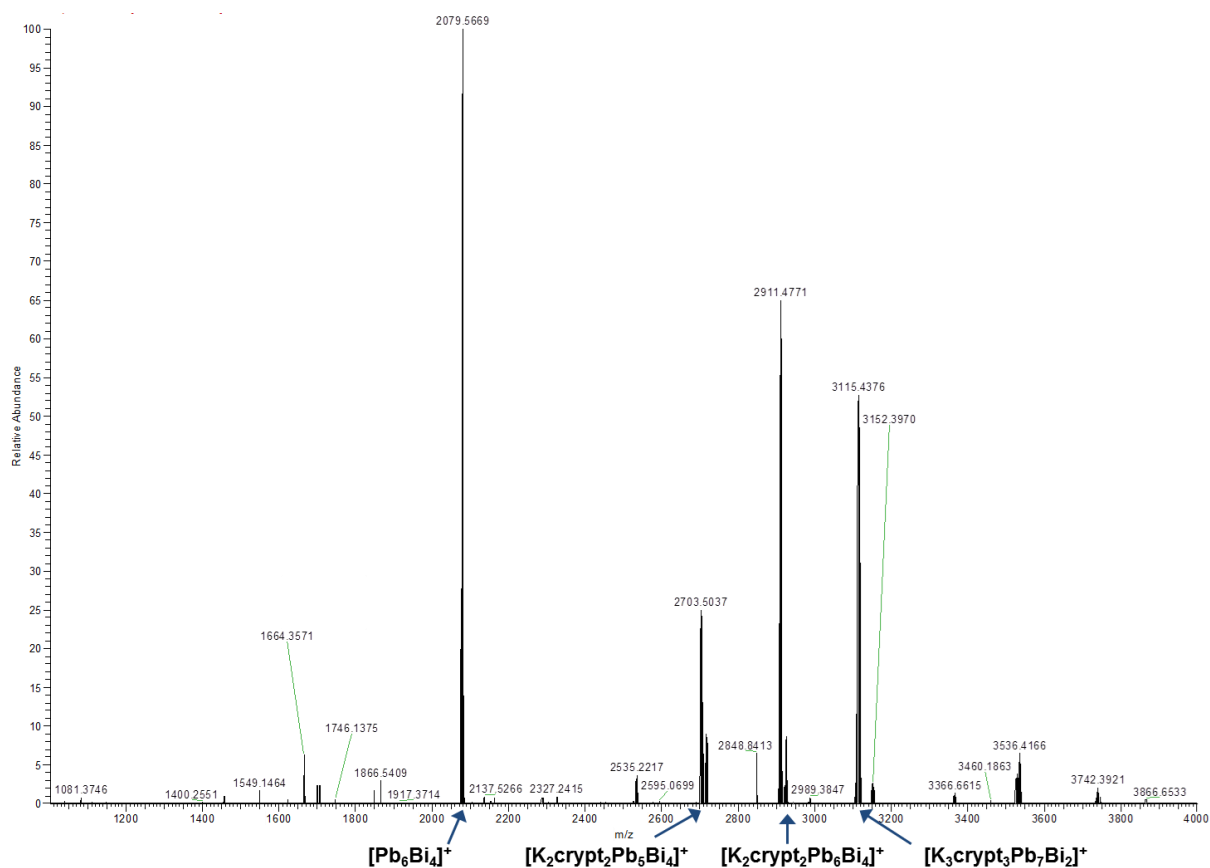

**Figure S6.** Overview ESI mass spectrum recorded from a solution of the as-prepared  $K(Pb,Bi)_2$  phase in *en* (positive ion more) with assignment of identifiable signals. Note that the intensity of the most prominent peak at  $m/z = 2079.5669$  is only 3% of the 100% intensity signal of the  $[Bi_2]^-/[Pb_1Bi_1]^-$  mixture at  $m/z = 416.95$  and  $417.96$ , which are not shown here.

Figure S7 - Figure S10 show zooms of identifiable peaks:

at  $m/z = 2079.56$ ; 10-atom fragment  $[Pb_6Bi_4]^+$

at  $m/z = 2703.50$ ; 9-atom fragment  $[K_2crypt_2Pb_5Bi_4]^+$

at  $m/z = 2911.47$ ; 10-atom fragment  $[K_2crypt_2Pb_6Bi_4]^+$

at  $m/z = 3115.43$ ; 9-atom fragment  $[K_3crypt_3Pb_7Bi_2]^+$

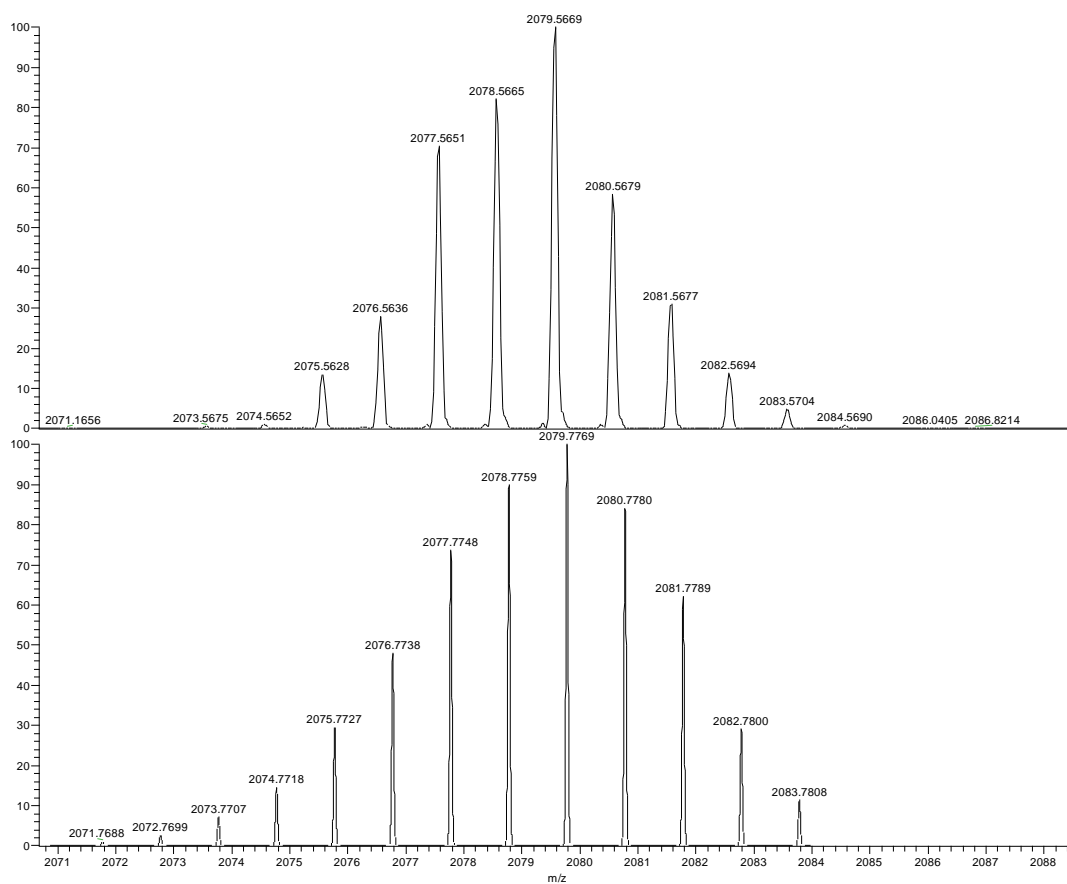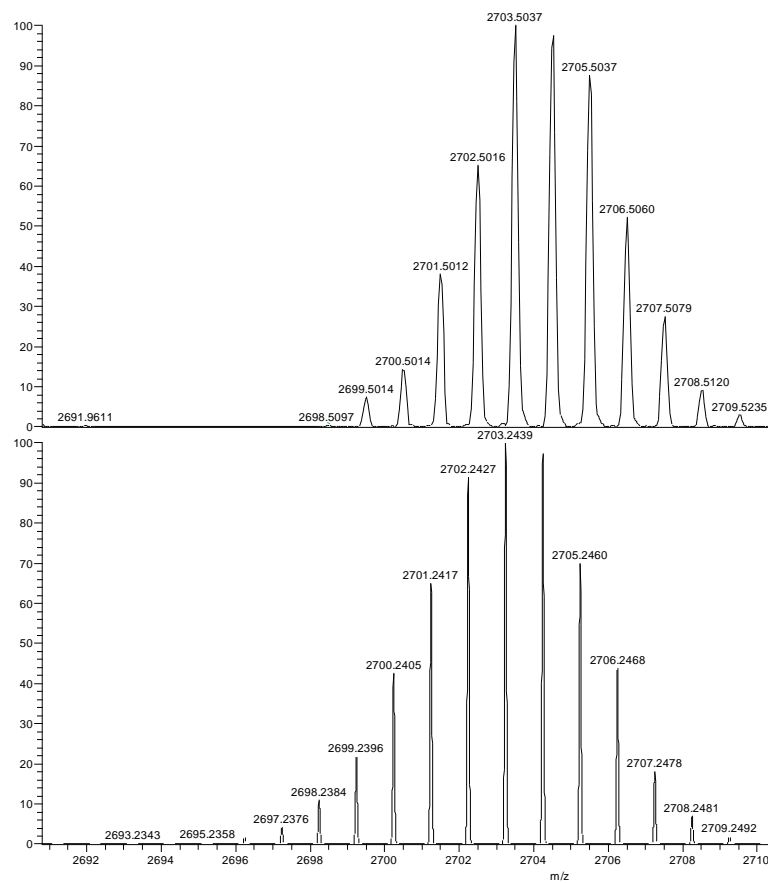

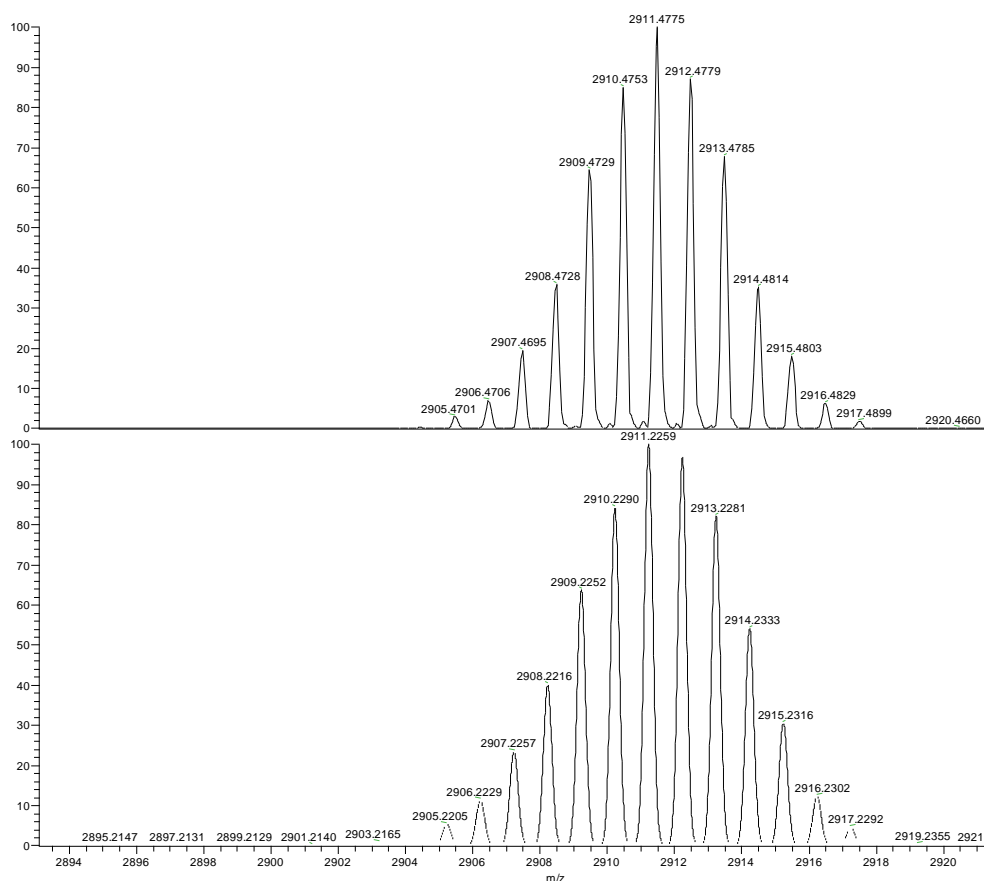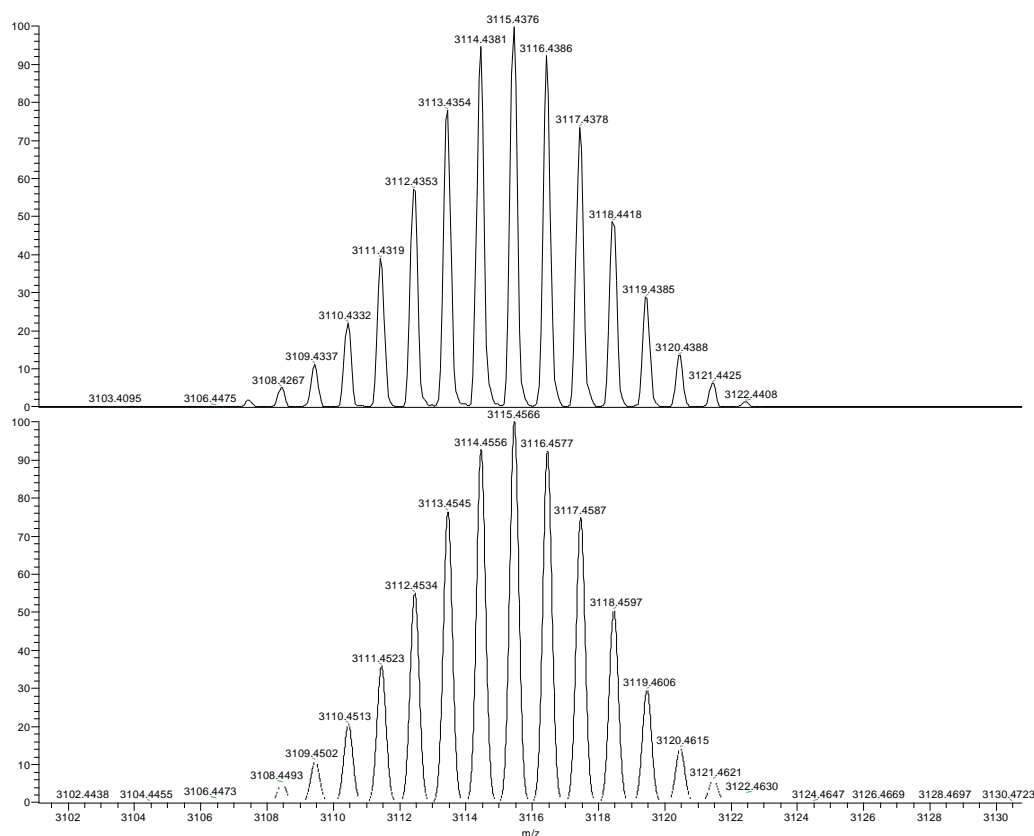

Investigations in the negative ion mode were performed on both  $\text{K}(\text{Pb},\text{Bi})_2$  and single-crystals of **1**. These are identical and also show fragmentation (Figure S11). Here, the most prominent signal derives from a four-atom cage  $[\text{Pb}_1\text{Bi}_3]^-$  at  $m/z = 834.9180$ , being followed by the  $[\text{Bi}_2]^-/[\text{Pb}_1\text{Bi}_1]^-$  mixture at  $m/z = 416.96$  and  $417.96$ . At higher masses, one observes 8-atom and 9-atom fragments, also under attachment of  $\text{K}([2.2.2]\text{crypt})$ . The  $m/z$  region in between is covered with signal from species that contain fragments of the organic cryptand molecules, and which have therefore not been assignable. Clearly, the fragmentation of the precursor is visible in *en* and explains the possibility of reorganization into compound **2**, **3** and **4**.

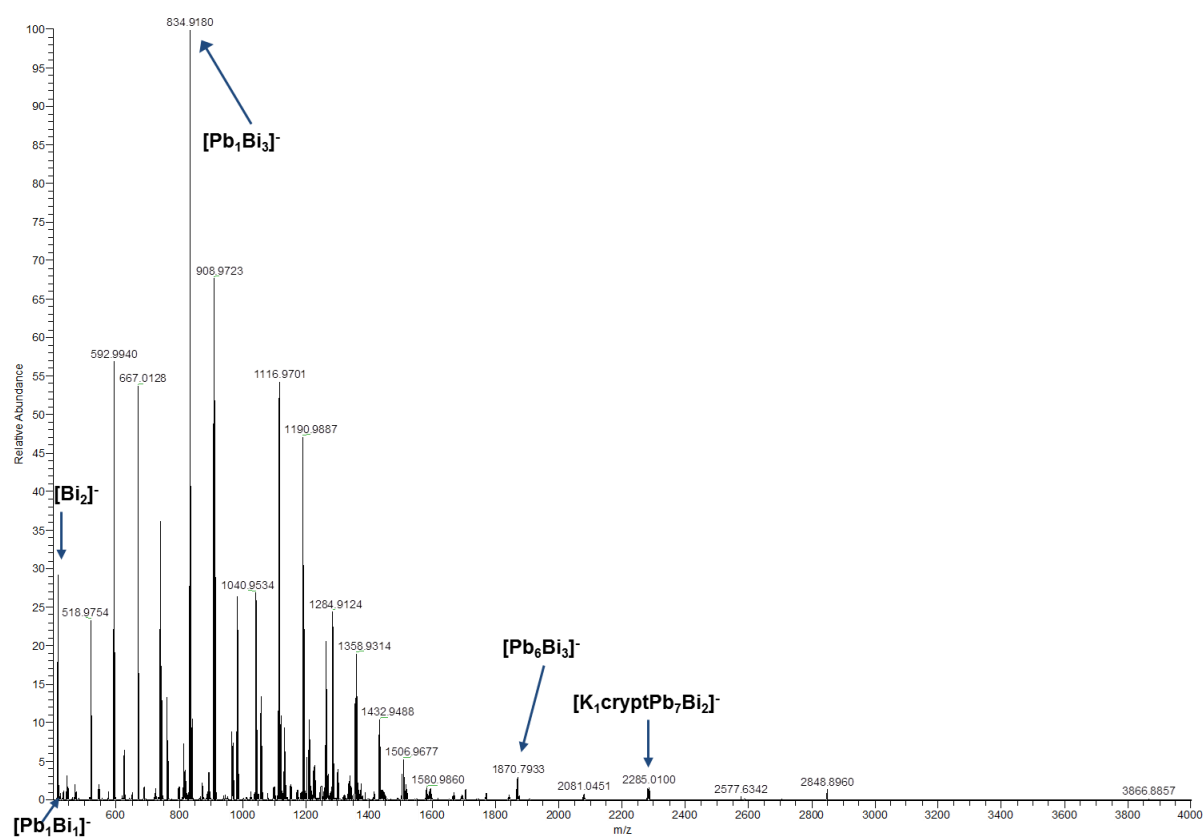

**Figure S11.** Overview ESI mass spectrum recorded from a solution of single-crystals of **1** in *en* (negative ion mode) with assignment of identifiable peaks. Similar results are obtained from *en* solutions of the as-prepared  $\text{K}(\text{Pb},\text{Bi})_2$  phase.

Figure S12 - Figure S15 show zooms of identifiable peaks:

at  $m/z = 416.96$ ; 2-atom fragment  $[\text{Pb}_1\text{Bi}_1]^-$

at  $m/z = 417.96$ ; 2-atom fragment  $[\text{Bi}_2]^-$

at  $m/z = 834.92$ ; 4-atom fragment  $[\text{Pb}_1\text{Bi}_3]^-$

at  $m/z = 1870.79$ ; 9-atom fragment  $[\text{Pb}_6\text{Bi}_3]^-$

at  $m/z = 2855.01$ ; 9-atom fragment  $[\text{K}_1\text{crypt}_1\text{Pb}_7\text{Bi}_2]^-$

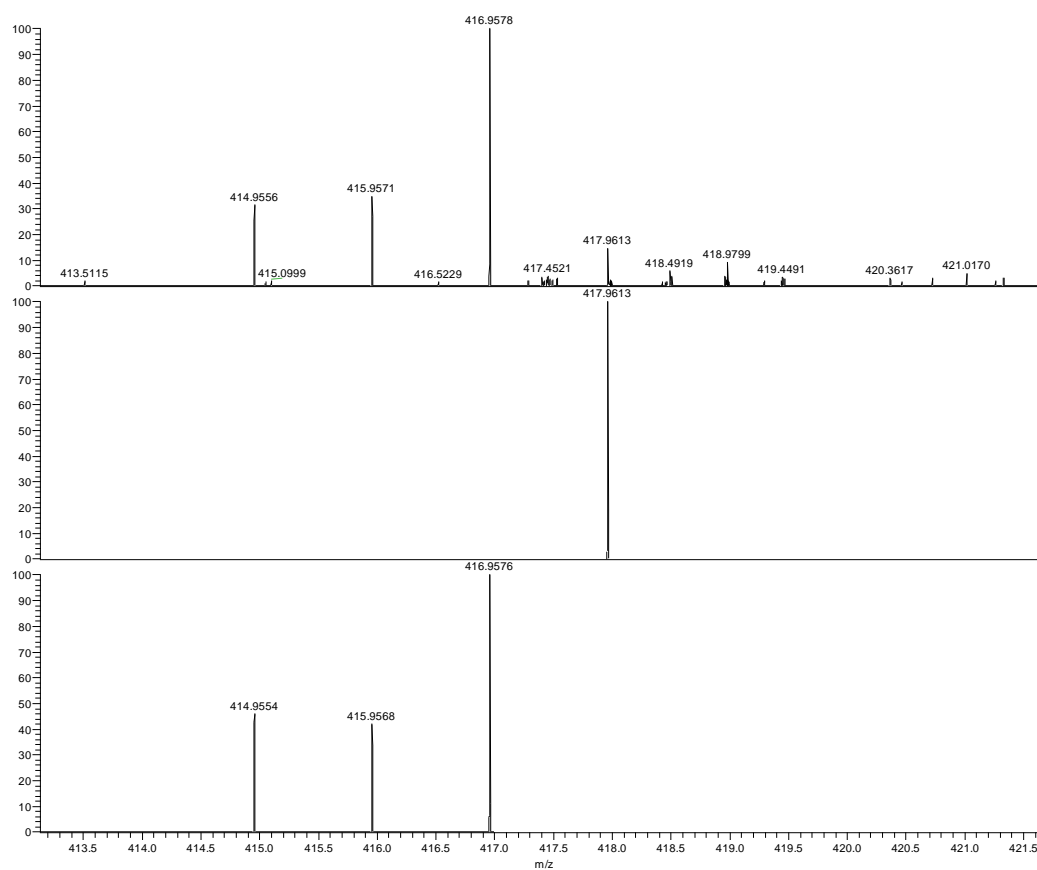

**Figure S12.** Measured (top) and simulated (center and bottom) spectrum of the fragments (from top)  $[\text{Bi}_2]^-$  and  $[\text{Pb}_1\text{Bi}_1]^-$ .

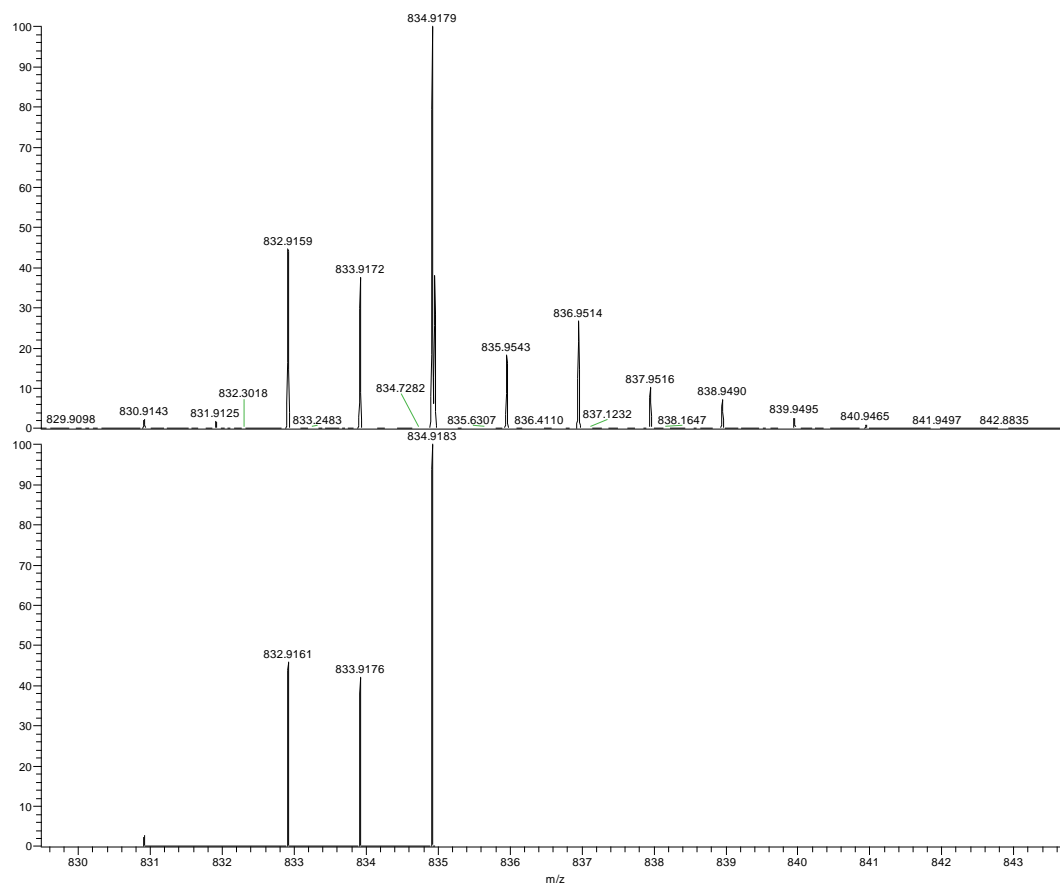

**Figure S13.** Measured (top) and simulated (bottom) spectrum of the fragment  $[\text{Pb}_1\text{Bi}_3]^-$ .

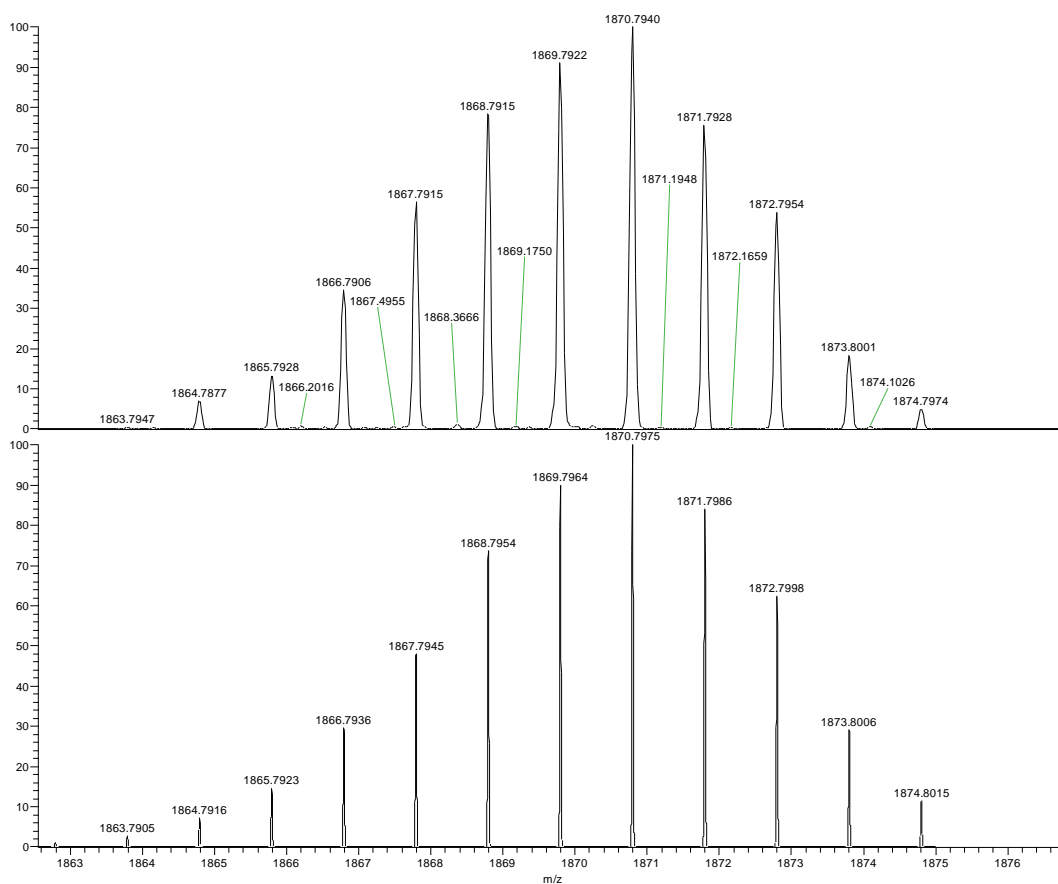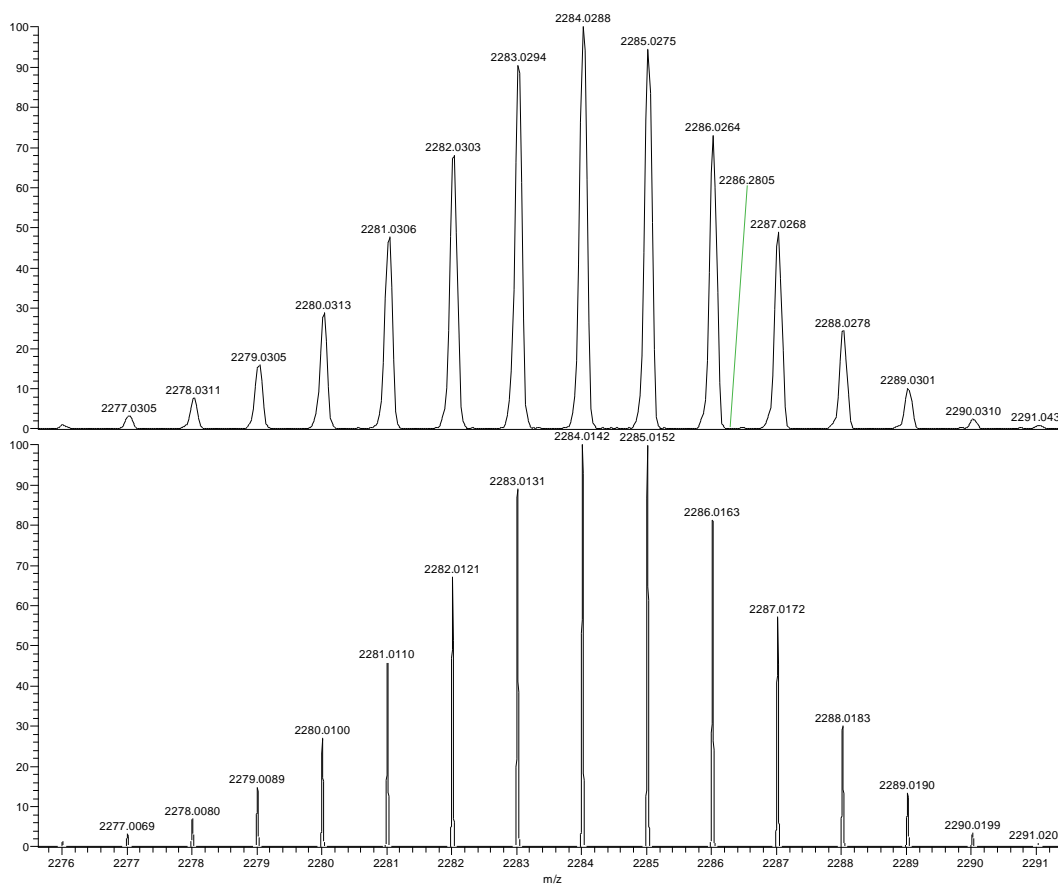

**Investigations in dimethylformamide (DMF, negative ion mode):** The overview ESI mass spectrum in negative mode, recorded immediately upon injection of a fresh solution of hand-selected single crystals of **1** in DMF, is provided in Figure S16. As for solutions in *en*, the ESI mass spectra indicate a fragmentation of the material and formation of other species. However, the fragmentation pattern is different from that observed in *en*; several molecular peaks appeared at the heaviest mass section 1800 – 2350 *m/z* that indicate the presence of Pb/Bi 9-atom cages. Also, the protonated form  $[\text{Pb}_7\text{Bi}_2\text{H}]^-$  and  $[\text{K}_1\text{crypt}_1\text{Pb}_7\text{Bi}_2]^-$  were detected in a small concentration. Many different fragments of lower *m/z* values are also present, that could be assigned to species with 2 – 8 atoms (Figure S17 - Figure S27). Due to the low intensity of many peaks, the most abundant mass (the most frequent isotopic distribution) has been used for comparison of measured and calculated peaks.

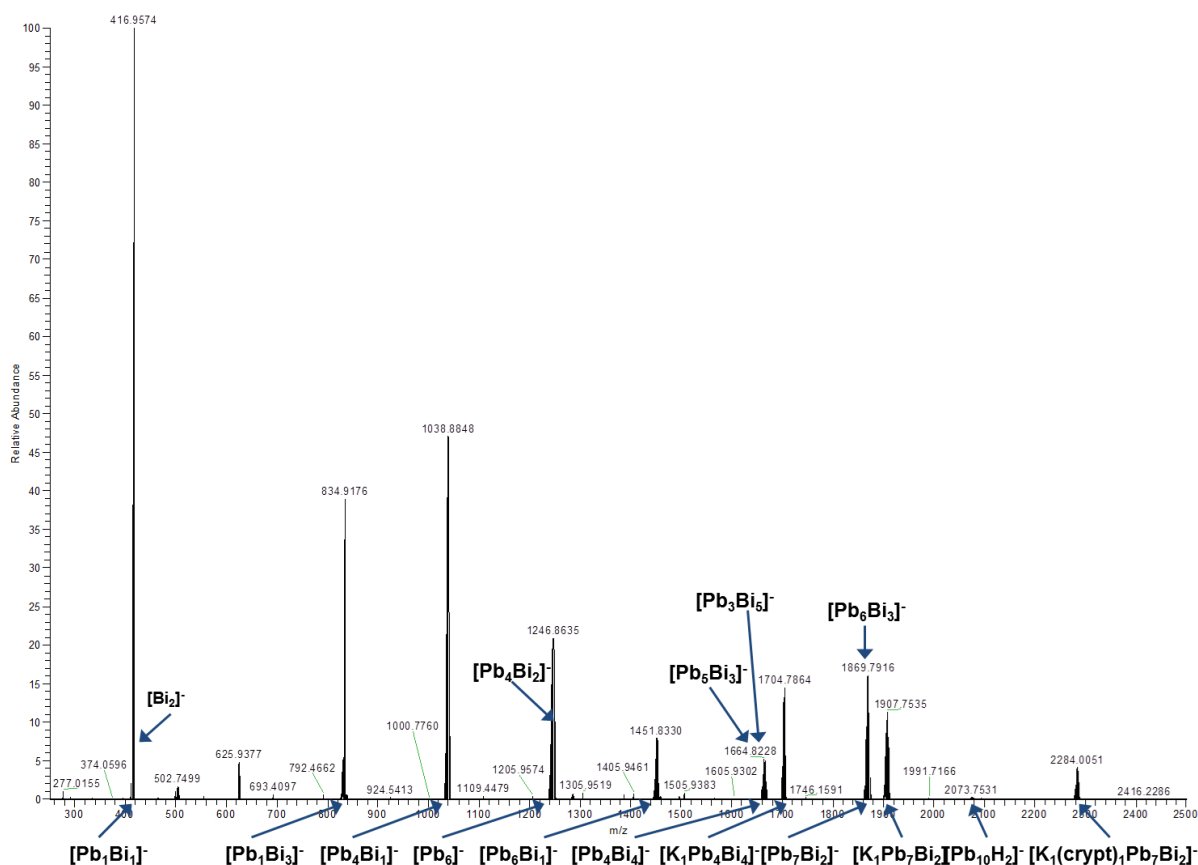

**Figure S16.** Overview ESI mass spectrum recorded from a solution of single-crystals of **1** in DMF with assignment of the most prominent peaks.



Figure S17 - Figure S27 show zooms of identifiable peaks:

- at  $m/z = 416.95$ ; 2-atom fragment  $[\text{Pb}_1\text{Bi}_1]^-$
- at  $m/z = 417.96$ ; 2-atom fragment  $[\text{Bi}_2]^-$
- at  $m/z = 834.92$ ; 4-atom fragment  $[\text{Pb}_1\text{Bi}_3]^-$
- at  $m/z = 1038.89$ ; 5-atom fragment  $[\text{Pb}_4\text{Bi}_1]^-$
- at  $m/z = 1243.86$ ; 6-atom fragment  $[\text{Pb}_6]^-$
- at  $m/z = 1246.86$ ; 6-atom fragment  $[\text{Pb}_4\text{Bi}_2]^-$
- at  $m/z = 1451.83$ ; 7-atom fragment  $[\text{Pb}_6\text{Bi}_1]^-$
- at  $m/z = 1662.82$ ; 8-atom fragment  $[\text{Pb}_5\text{Bi}_3]^-$
- at  $m/z = 1665.82$ ; 8-atom fragment  $[\text{Pb}_4\text{Bi}_4]^-$
- at  $m/z = 1666.82$ ; 8-atom fragment  $[\text{Pb}_3\text{Bi}_5]^-$
- at  $m/z = 1704.78$ ; 8-atom fragment  $[\text{K}_1\text{Pb}_4\text{Bi}_4]^-$
- at  $m/z = 1868.80$ ; 9-atom fragment  $[\text{Pb}_7\text{Bi}_2]^-$
- at  $m/z = 1870.80$ ; 9-atom fragment  $[\text{Pb}_6\text{Bi}_3]^-$
- at  $m/z = 1907.75$ ; 9-atom fragment  $[\text{K}_1\text{Pb}_7\text{Bi}_2]^-$
- at  $m/z = 2074.77$ ; 10-atom fragment  $[\text{Pb}_{10}\text{H}_2]^-$  (trace)
- at  $m/z = 2285.00$ ; 9-atom fragment  $[\text{K}_1\text{crypt}_1\text{Pb}_7\text{Bi}_2]^-$

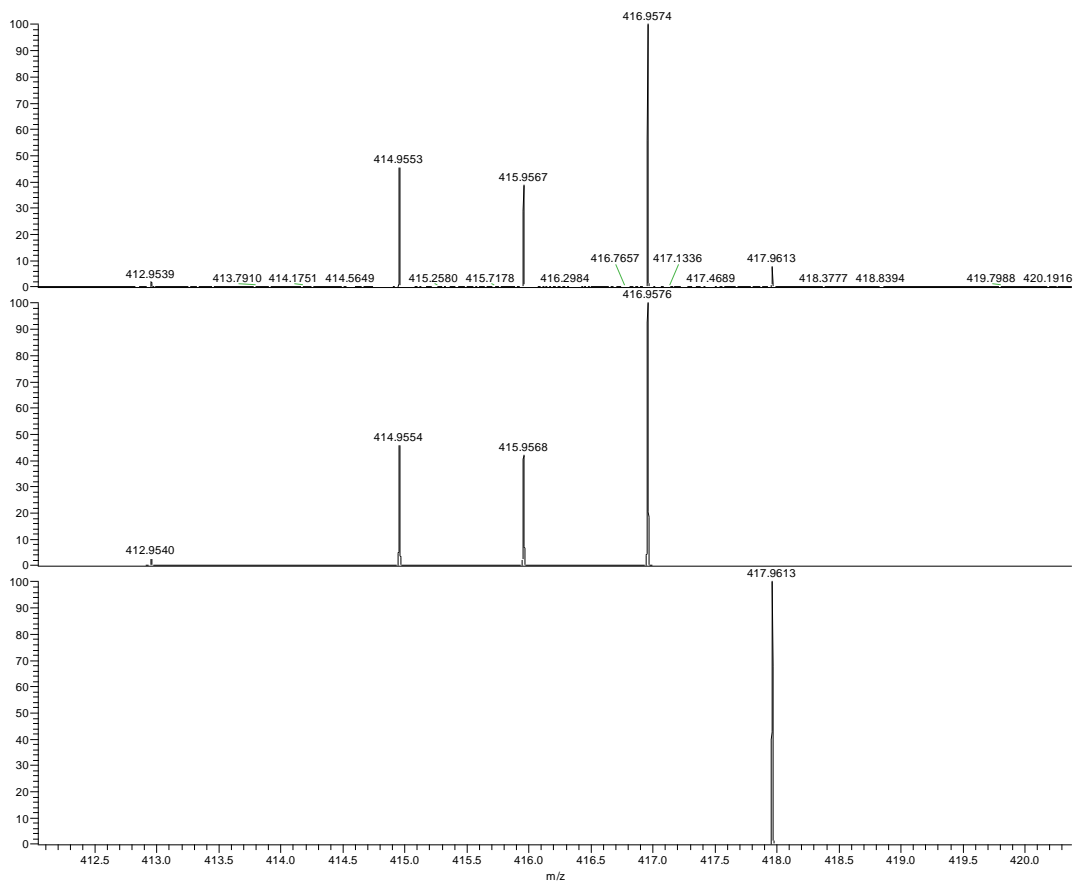

**Figure S17.** Measured (top) and simulated (center and bottom) spectrum of the fragments (from top)  $[\text{Pb}_1\text{Bi}_1]^-$  and  $[\text{Bi}_2]^-$ .

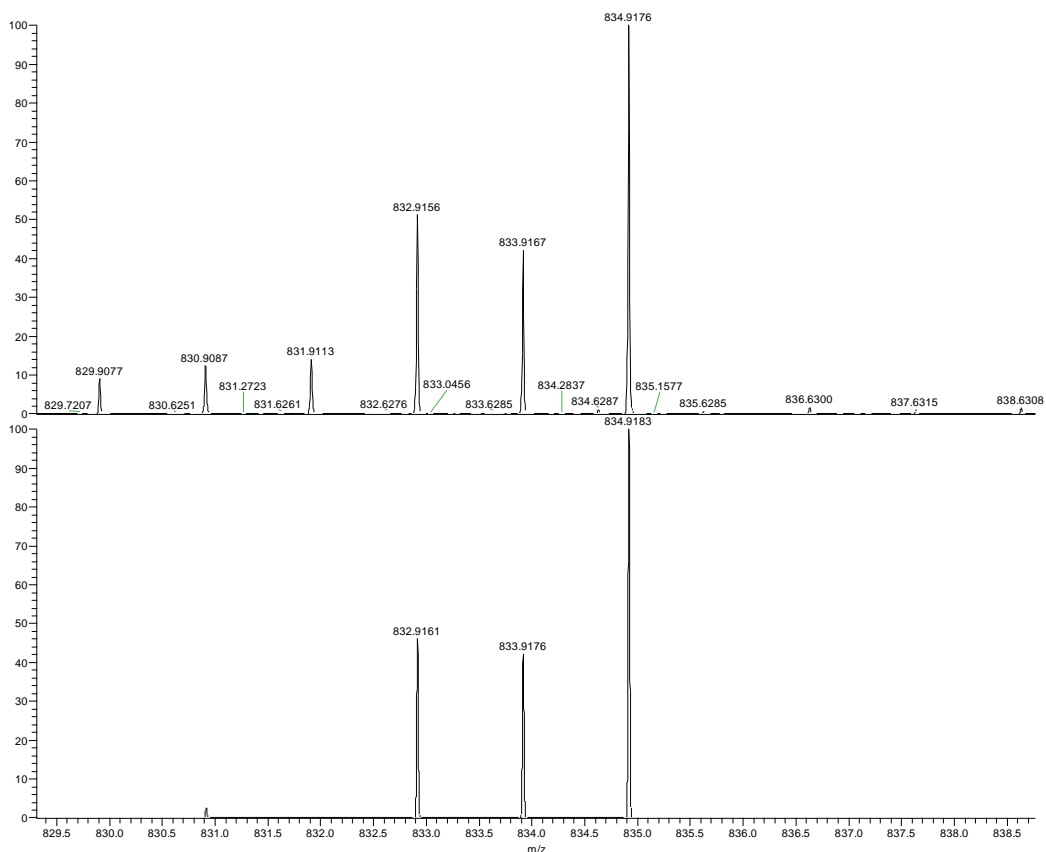

**Figure S18.** Measured (top) and simulated (bottom) spectrum of the fragment  $[\text{Pb}_1\text{Bi}_3]^-$ .

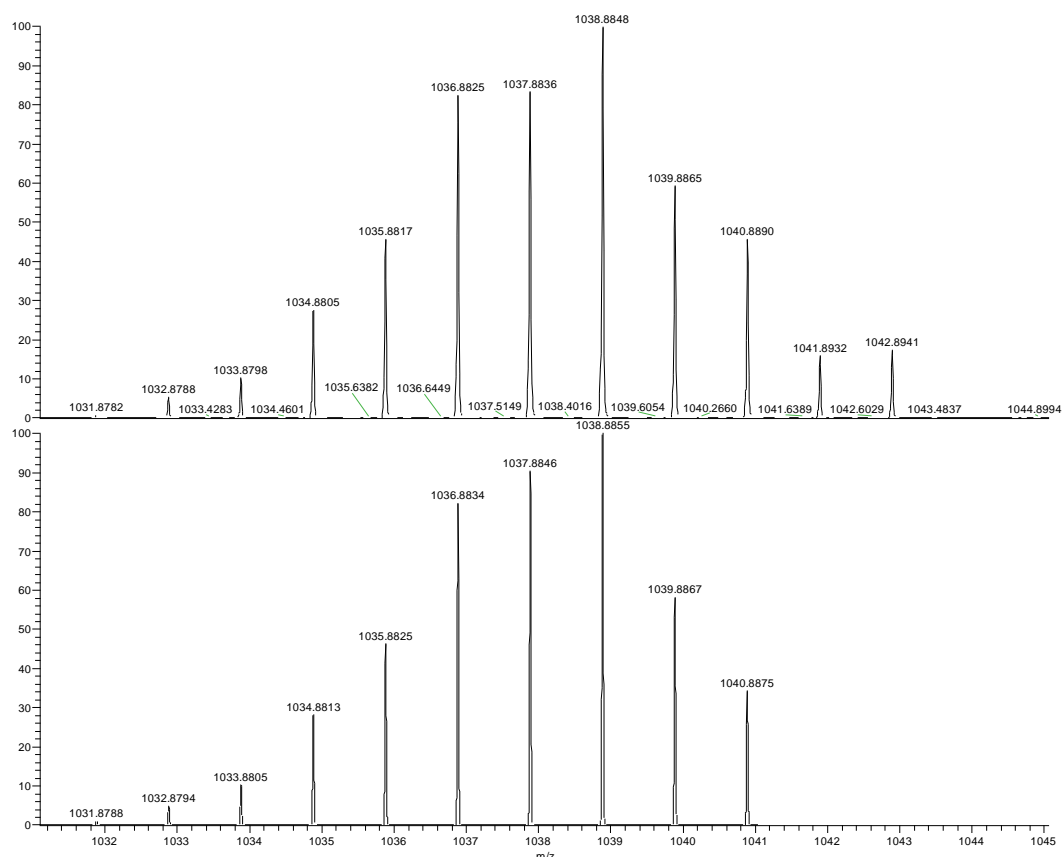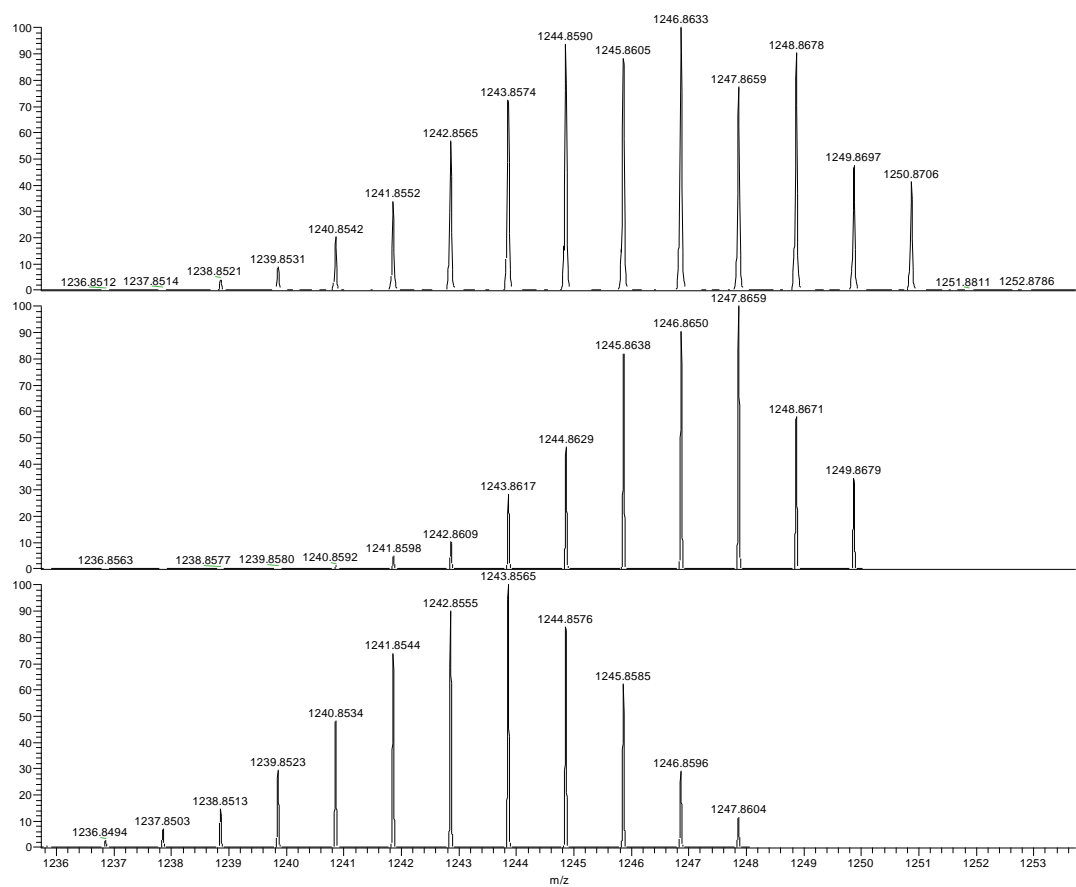

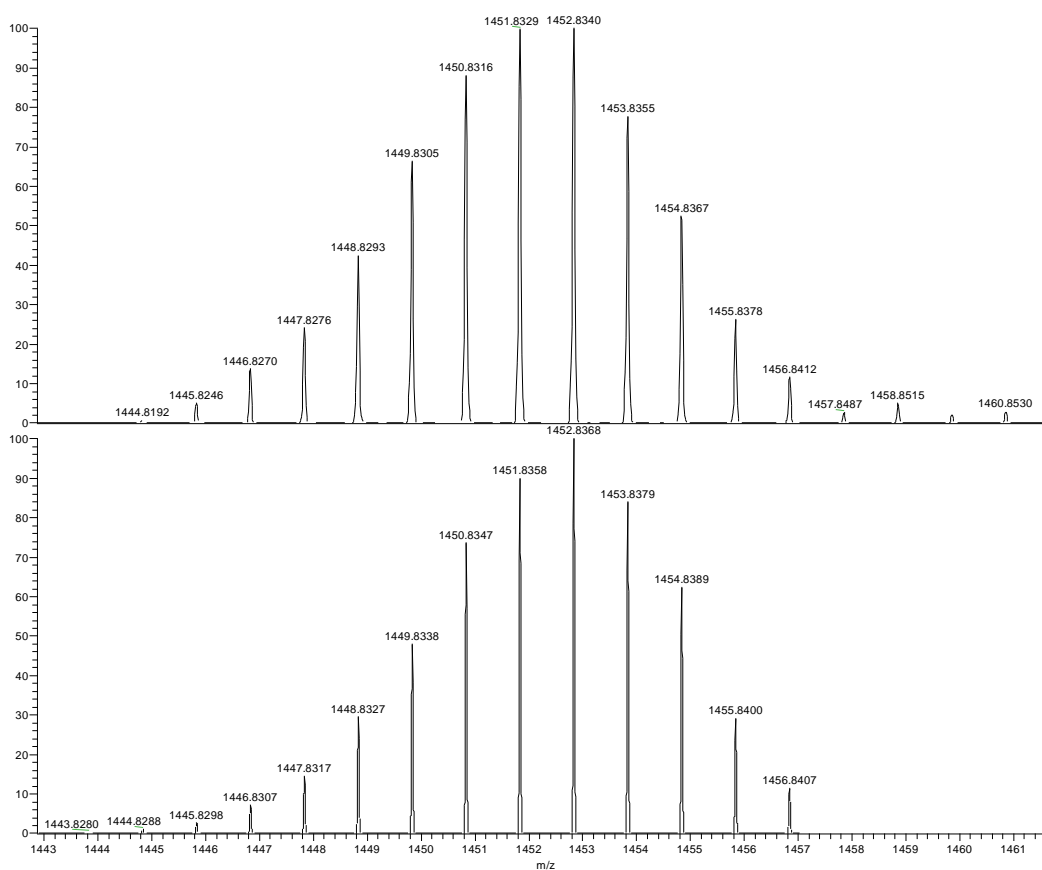

Figure S21. Measured (top) and simulated (bottom) spectrum of the fragment  $[Pb_6Bi_1]^-$ .

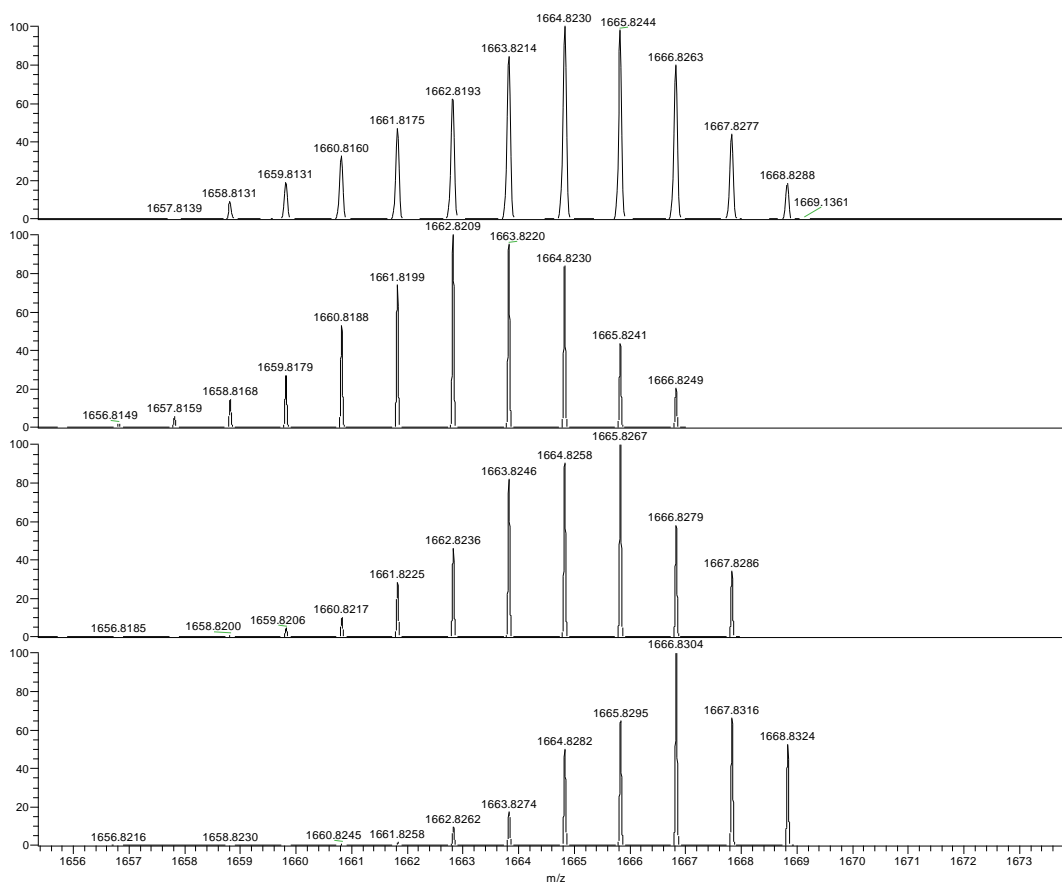

Figure S22. Measured (top) and simulated (centers and bottom) spectrum of the fragments (from top)  $[Pb_5Bi_3]^-$ ,  $[Pb_4Bi_4]^-$  and  $[Pb_3Bi_5]^-$ .

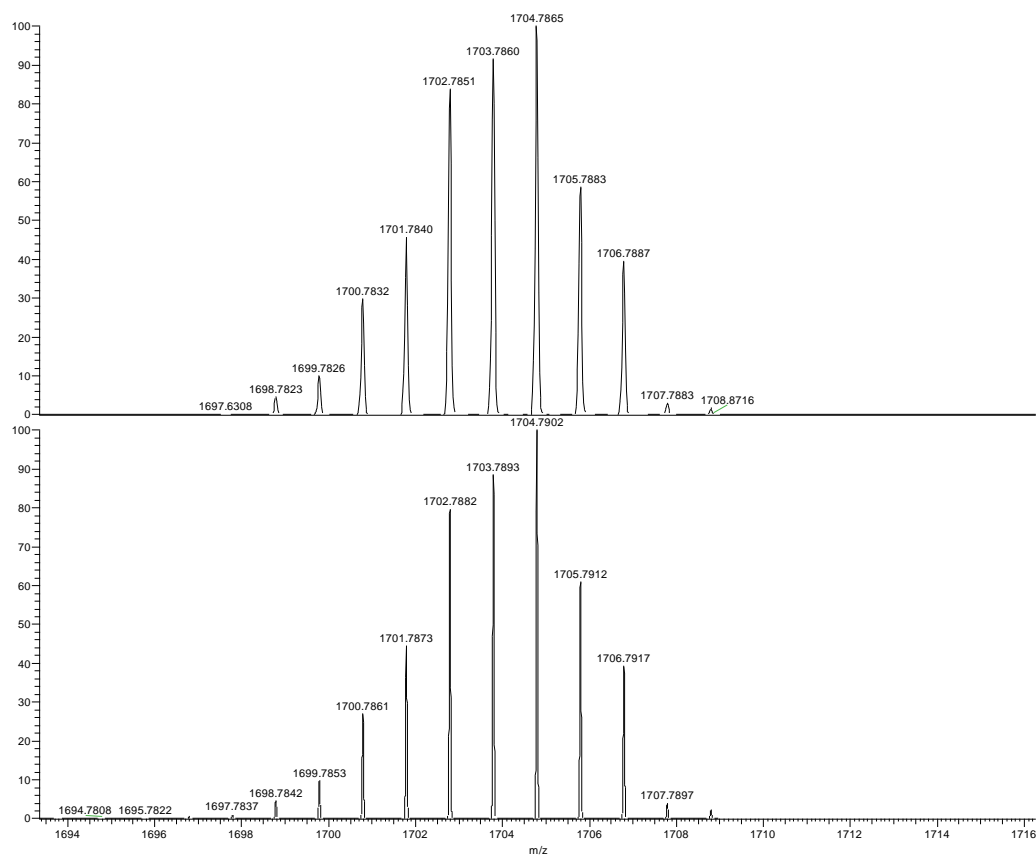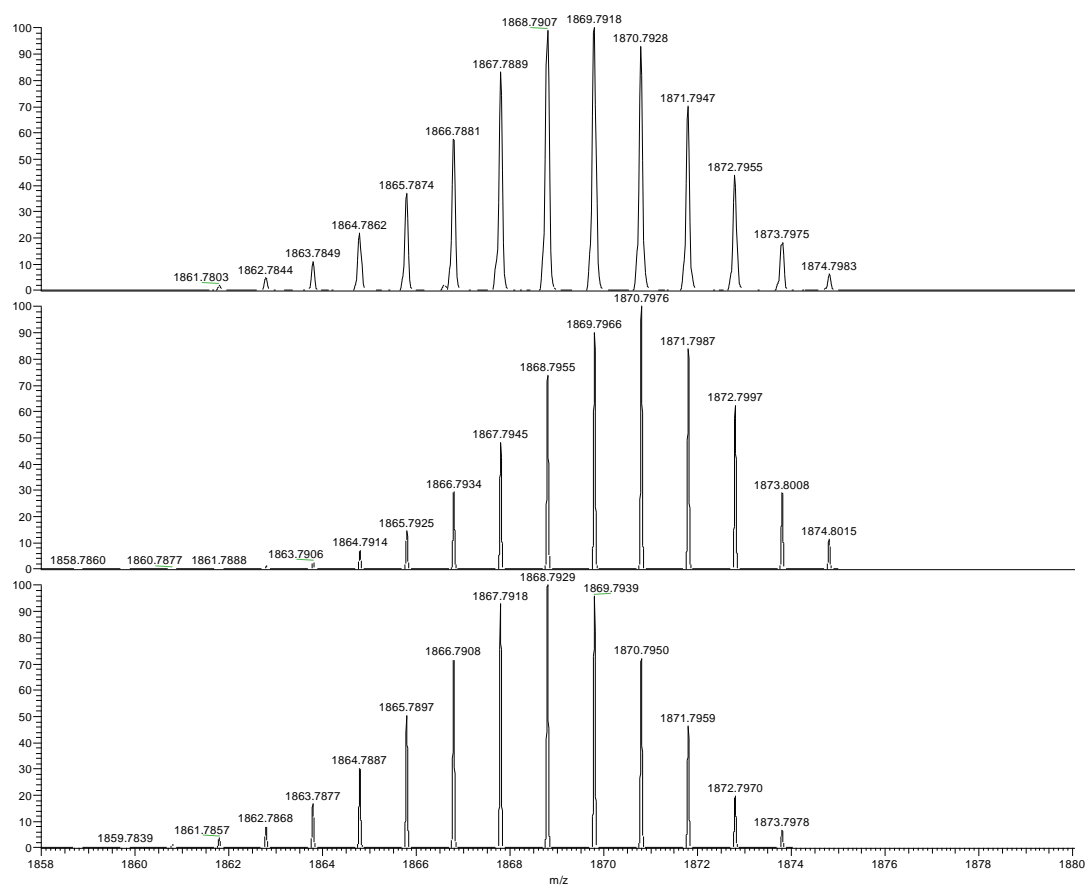

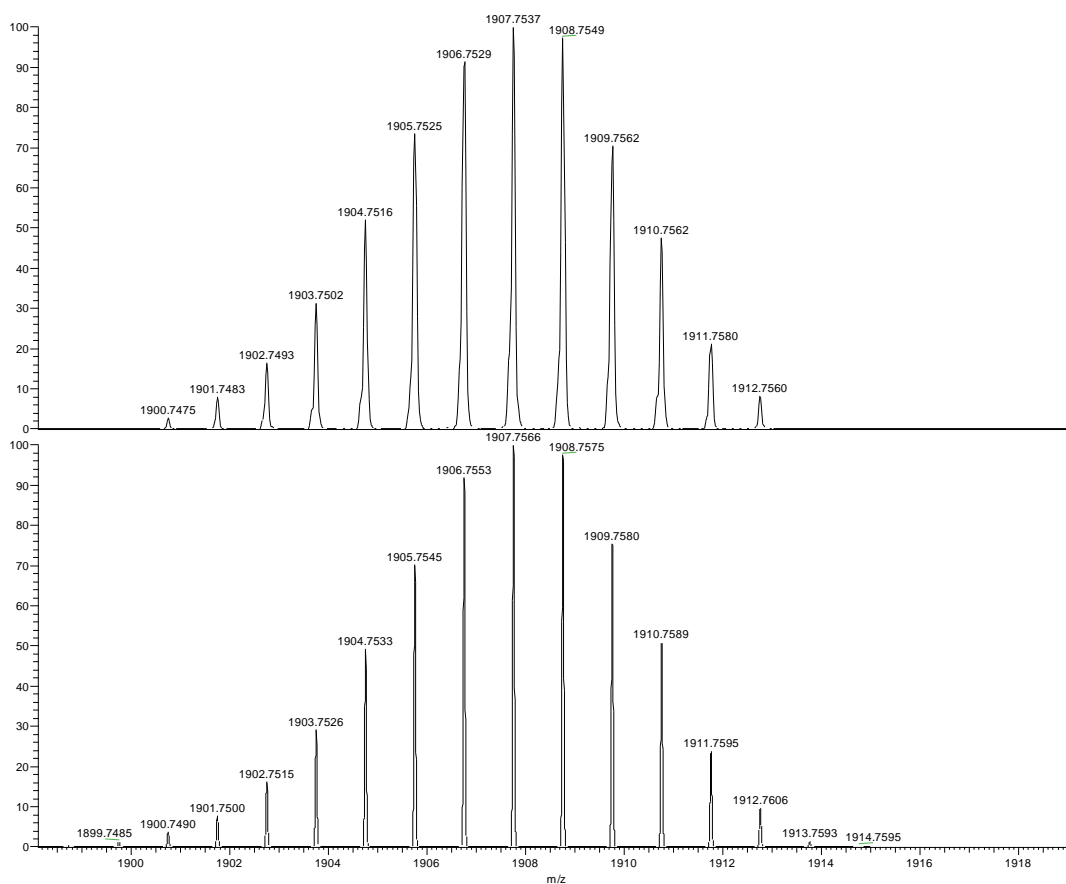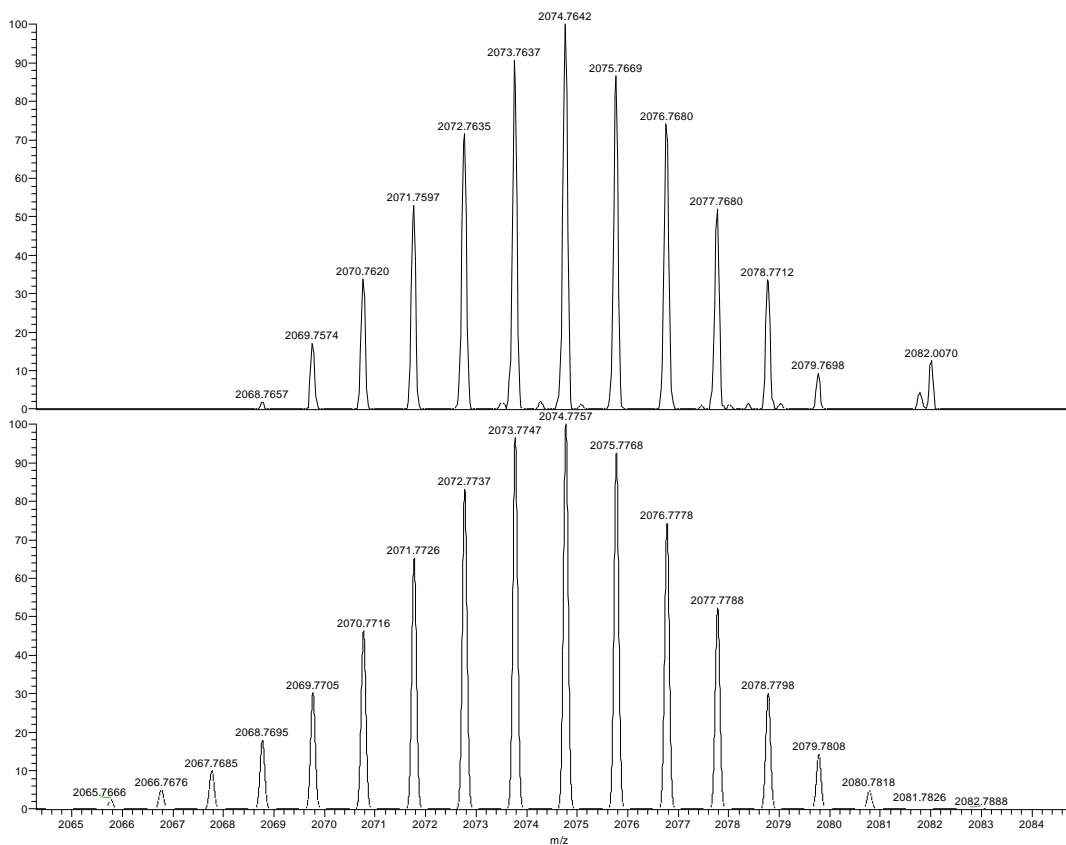

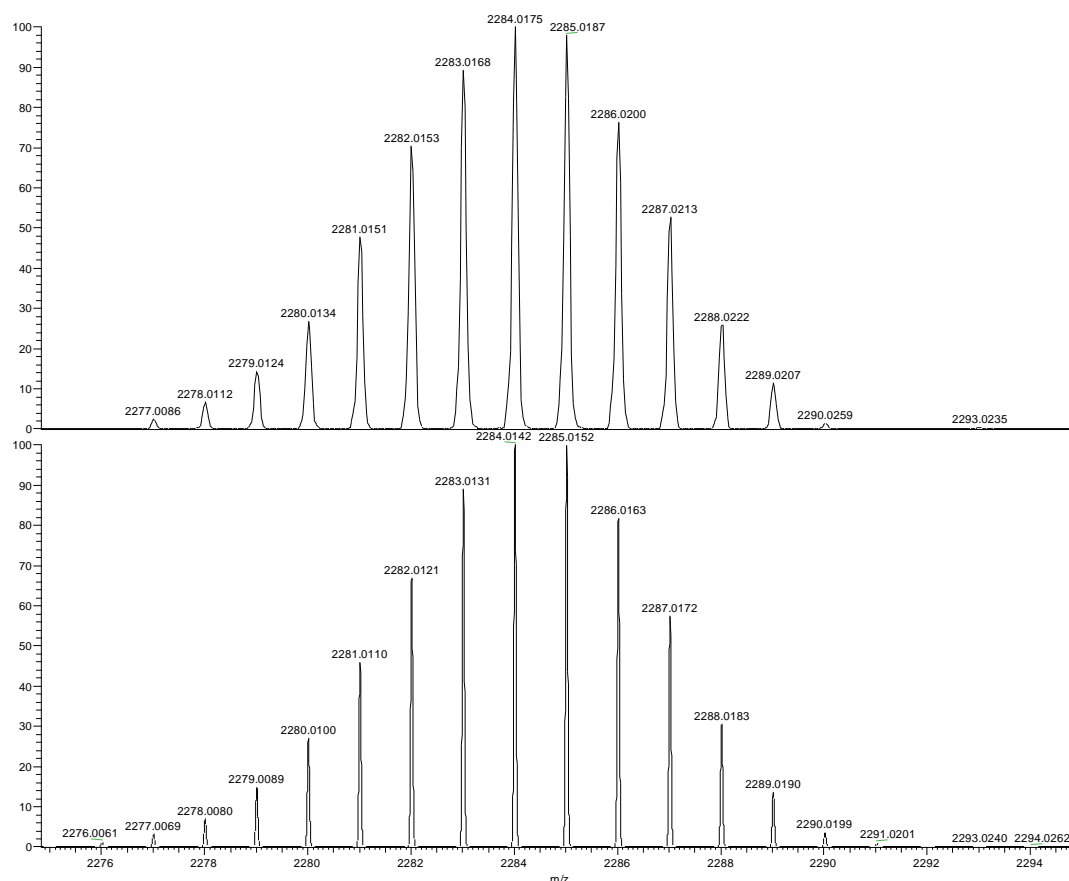

**Figure S27.** Measured (top) and simulated (bottom) spectrum of the fragment  $[K_1(\text{crypt})_1\text{Pb}_7\text{Bi}_2]^-$ .

#### 4.2 ESI-MS Investigations of crystals of 3 and 4 in DMF

**General:** Crystals of **3** and **4** have been dissolved in DMF at room temperature and immediately injected. It was not possible to record ESI-MS spectra of the compounds in *en* solution, since the single-crystals decomposed to produce amorphous powder instead of dissolving.

**Investigation of compound 3:** Most predominant and significant peaks characteristic to cluster **3** – in agreement with EDX and the crystal structure analysis – are present in the higher *m/z* region, and demonstrate a fairly good stability (Figure S28). The formation of an  $[\text{Ni}_1\text{Pb}_6\text{Bi}_3]^-$  fragment may be the result of the dissolution of the single crystals in DMF, or may have been due to the ESI conditions. A zoom into the molecular peak of all species is provided in the main manuscript (Figure 3).

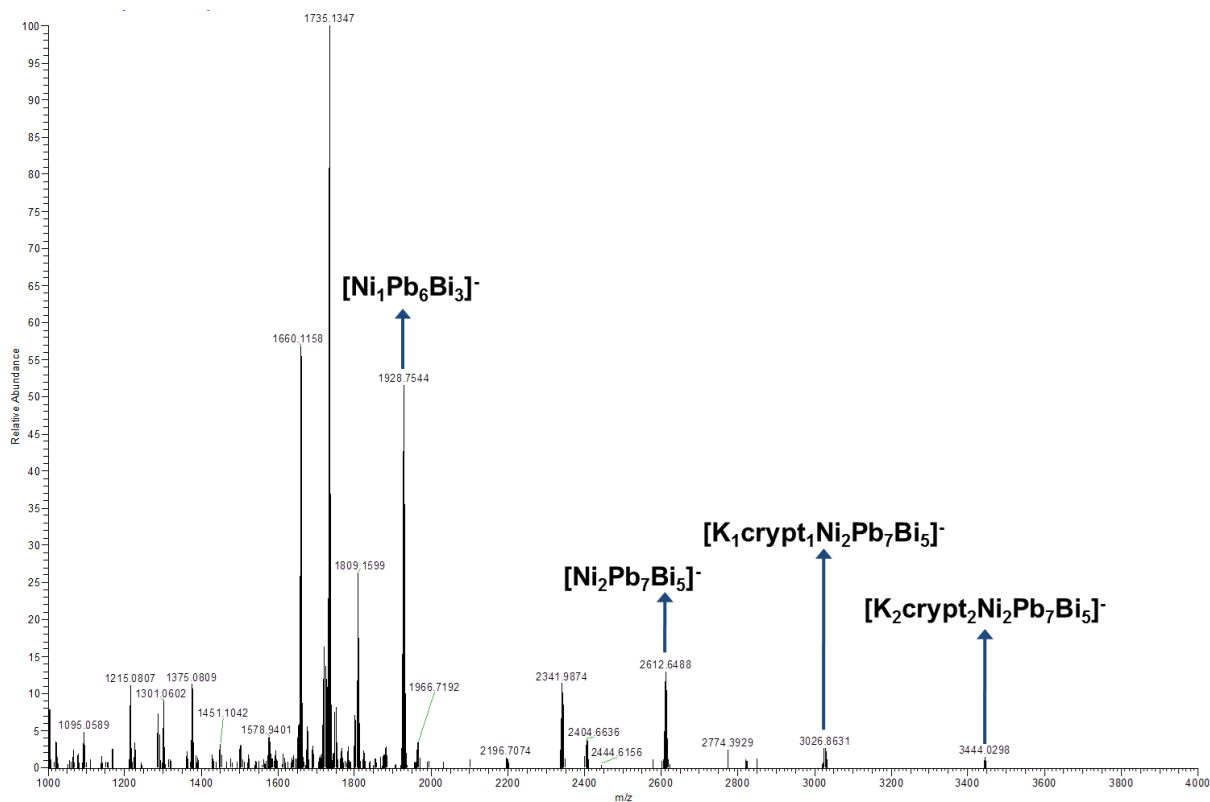

**Figure S28.** Overview ESI mass spectrum, recorded immediately upon injection of a fresh solution of hand-selected single crystals of **3** in DMF.

**Figure S29 - Figure S32** show zooms of identifiable peaks of **3**:

at  $m/z = 1928.75$ ; ten-atom fragment  $[\text{Ni}_1\text{Pb}_6\text{Bi}_3]^-$

at  $m/z = 2612.64$ ; fourteen-atom fragment  $[\text{Ni}_2\text{Pb}_7\text{Bi}_5]^-$

at  $m/z = 3026.86$ ; fourteen-atom fragment  $[\text{K}_1\text{crypt}_1\text{Ni}_2\text{Pb}_7\text{Bi}_5]^-$

at  $m/z = 3115.43$ ; fourteen-atom fragment  $[\text{K}_2\text{crypt}_2\text{Pb}_7\text{Bi}_5]^-$



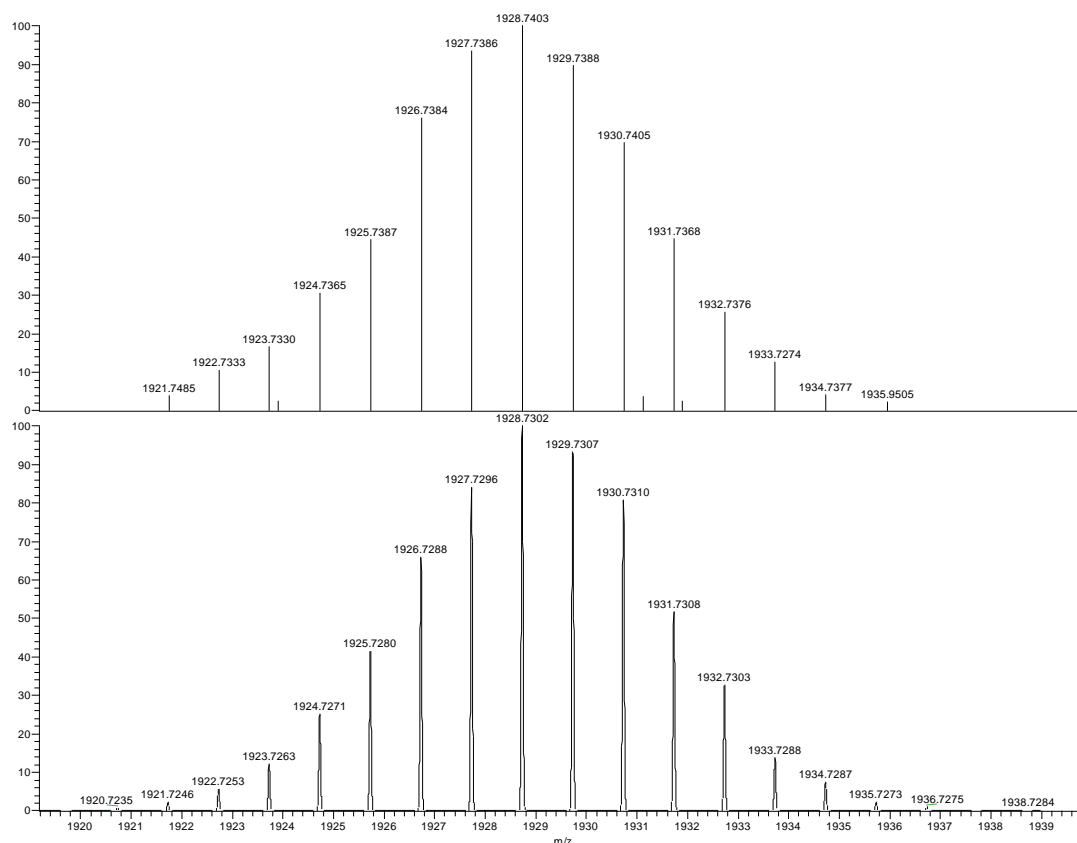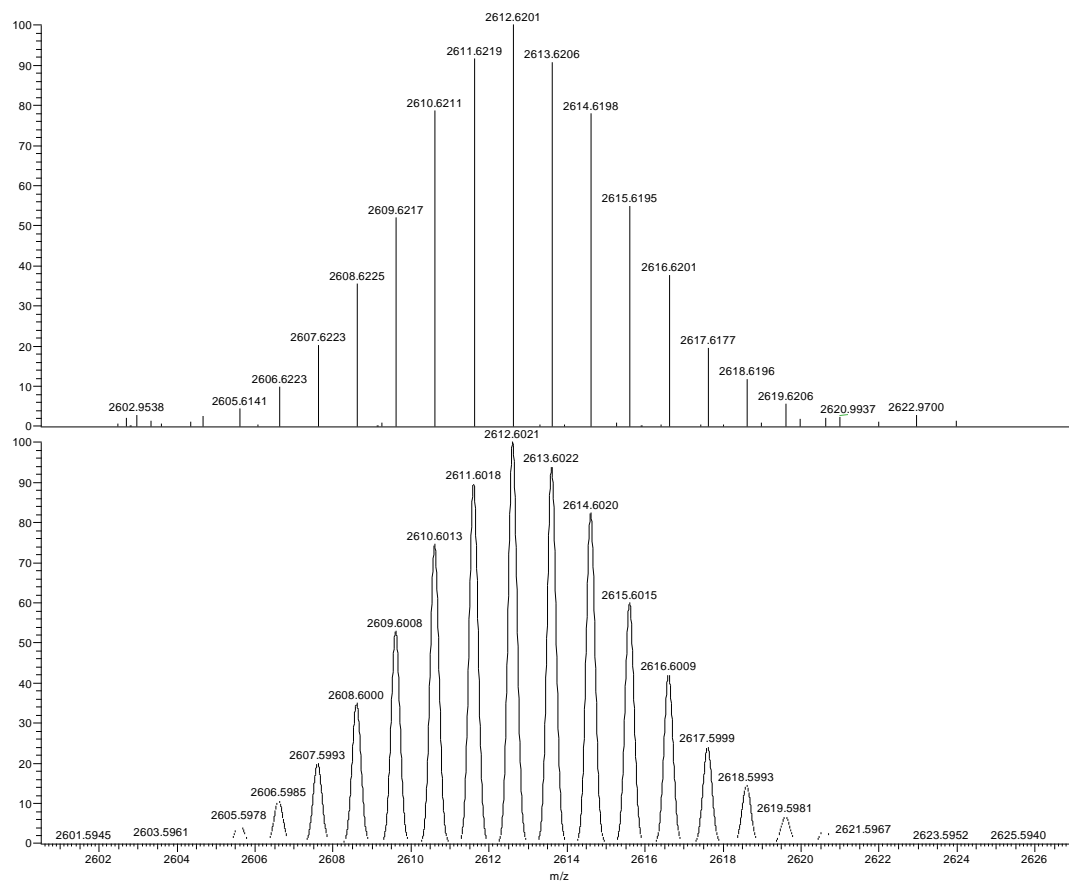

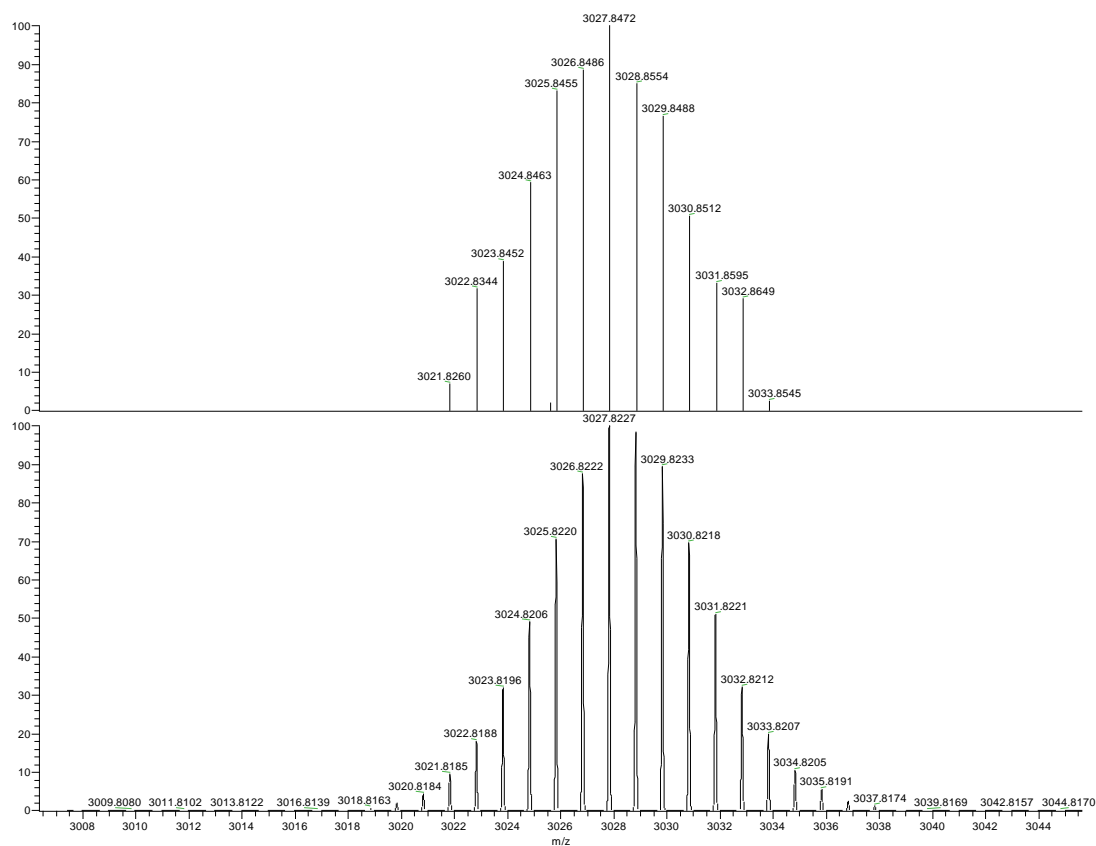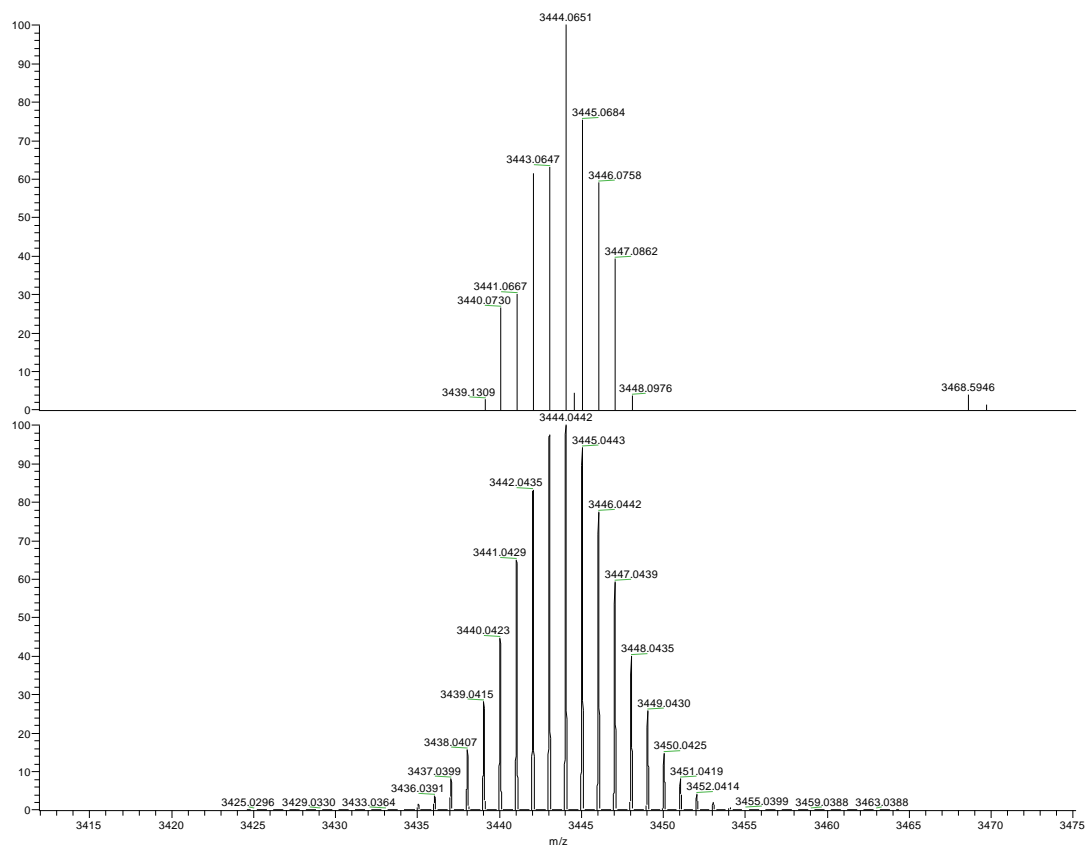

**Investigation of compound 4:** At lower  $m/z = 1800\text{--}2300$ , molecular peaks characteristic to the Pb/Bi nine-atom cage were observed. However, in the higher  $m/z = 3000\text{--}3520$  region, significant peaks occur that are characteristic to cluster **4** in the presence of  $[\text{K}([2.2.2]\text{crypt})]$ , showing a good stability and solubility under these conditions (Figure S33).

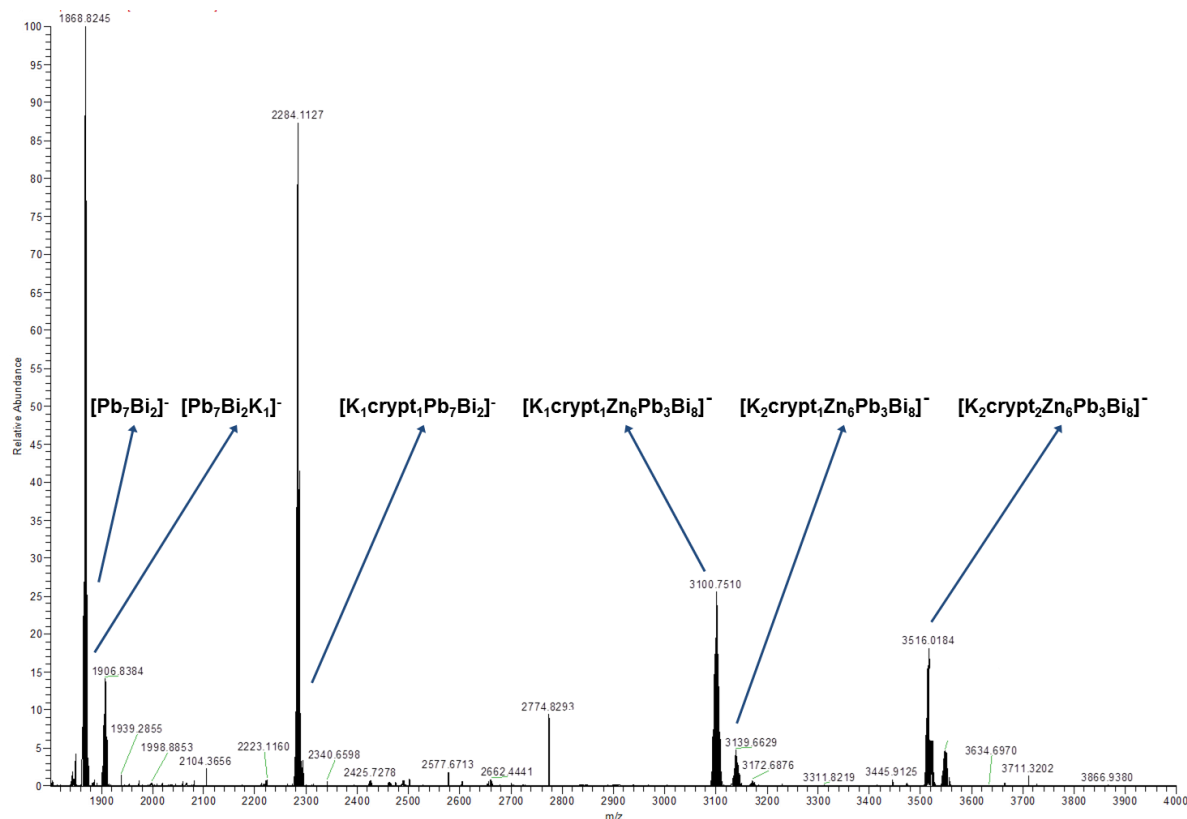

**Figure S33.** Overview ESI mass spectrum, recorded immediately upon injection of a fresh solution of hand-selected single crystals of **4** in DMF.

Figure S34 – Figure S39 show zooms of identifiable peaks of **4**:

at  $m/z = 1868.82$ ; nine-atom fragment  $[\text{Pb}_7\text{Bi}_2]^-$

at  $m/z = 1906.83$ ; nine-atom fragment  $\text{K}_1\text{Pb}_7\text{Bi}_2$

at  $m/z = 2248.11$ ; nine-atom fragment  $\text{K}_1\text{crypt}_1\text{Pb}_7\text{Bi}_2$

at  $m/z = 3100.75$ ; fifteen-atom fragment  $\text{K}_1\text{crypt}_1\text{Zn}_6\text{Pb}_3\text{Bi}_8$

at  $m/z = 3139.60$ ; fifteen-atom fragment  $\text{K}_2\text{crypt}_1\text{Zn}_6\text{Pb}_3\text{Bi}_8$

at  $m/z = 3515.77$ ; fifteen-atom fragment  $\text{K}_2\text{crypt}_2\text{Zn}_6\text{Pb}_3\text{Bi}_8$

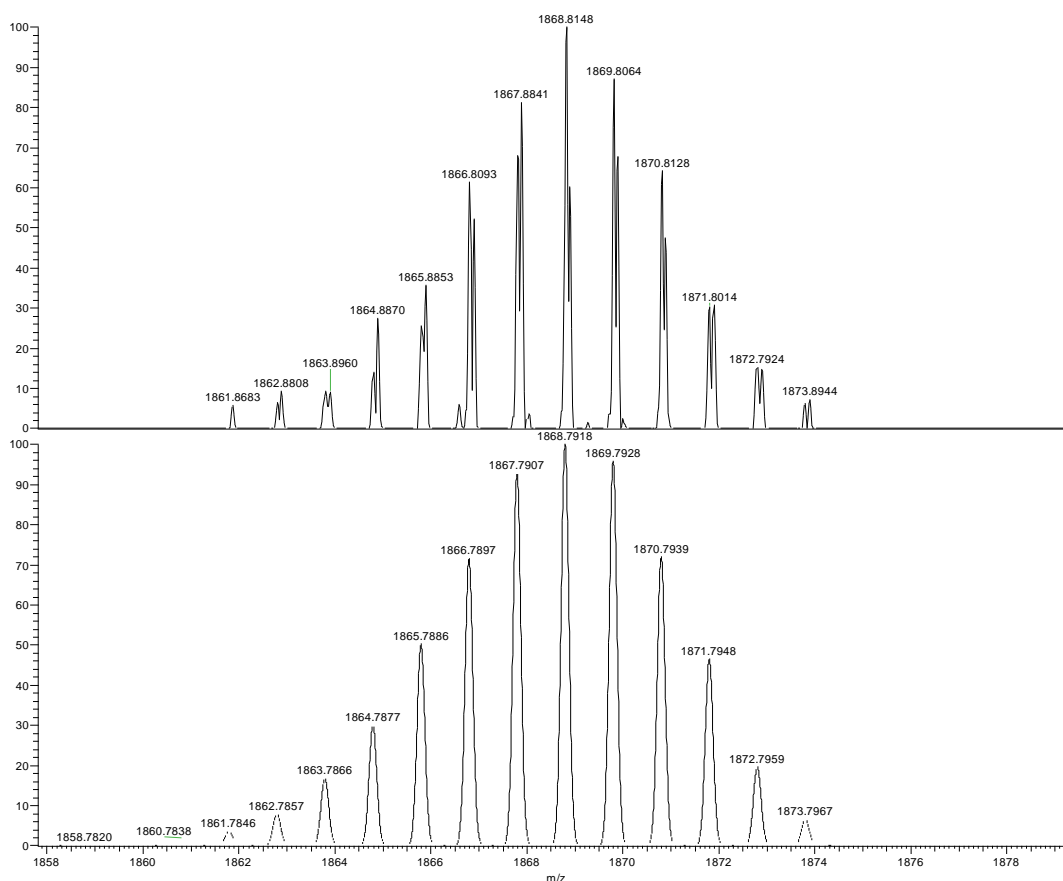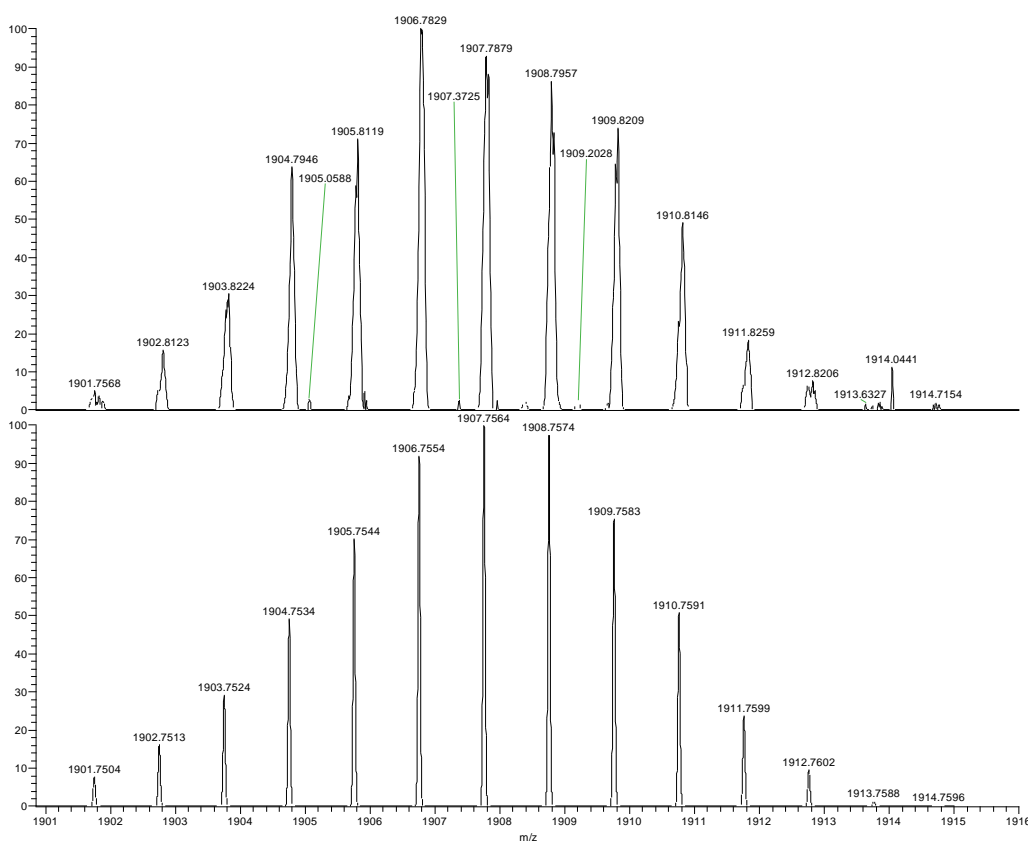

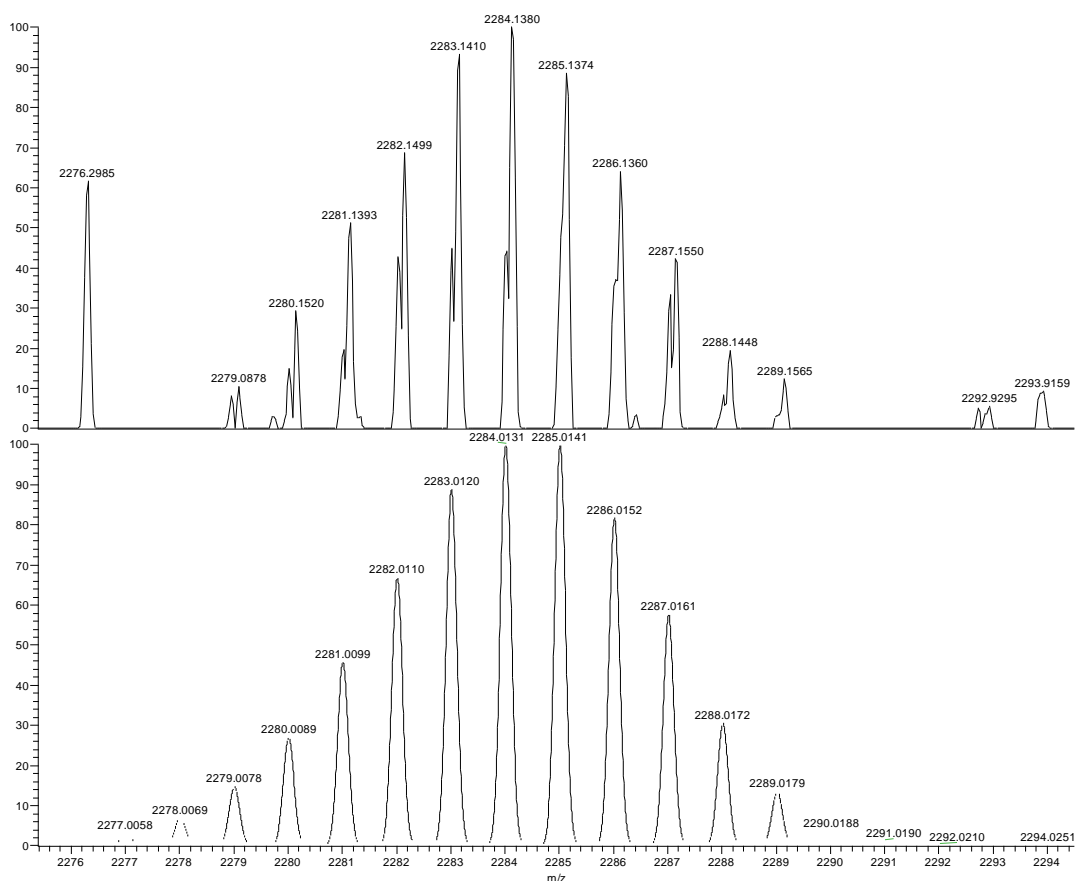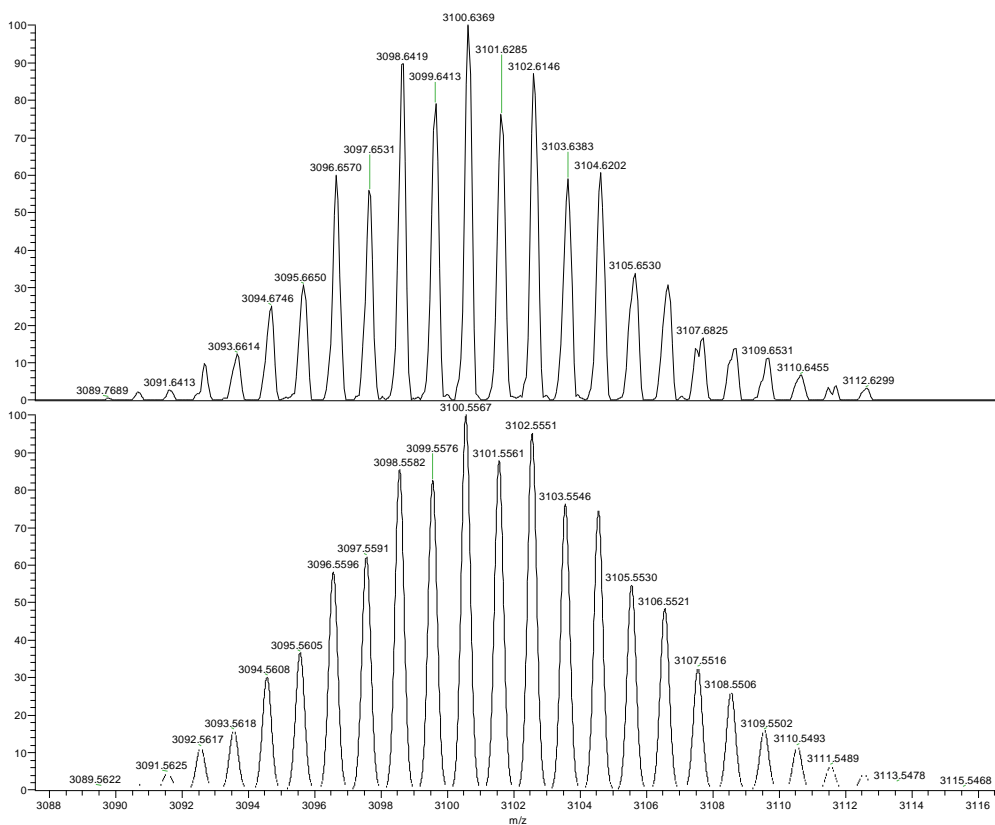

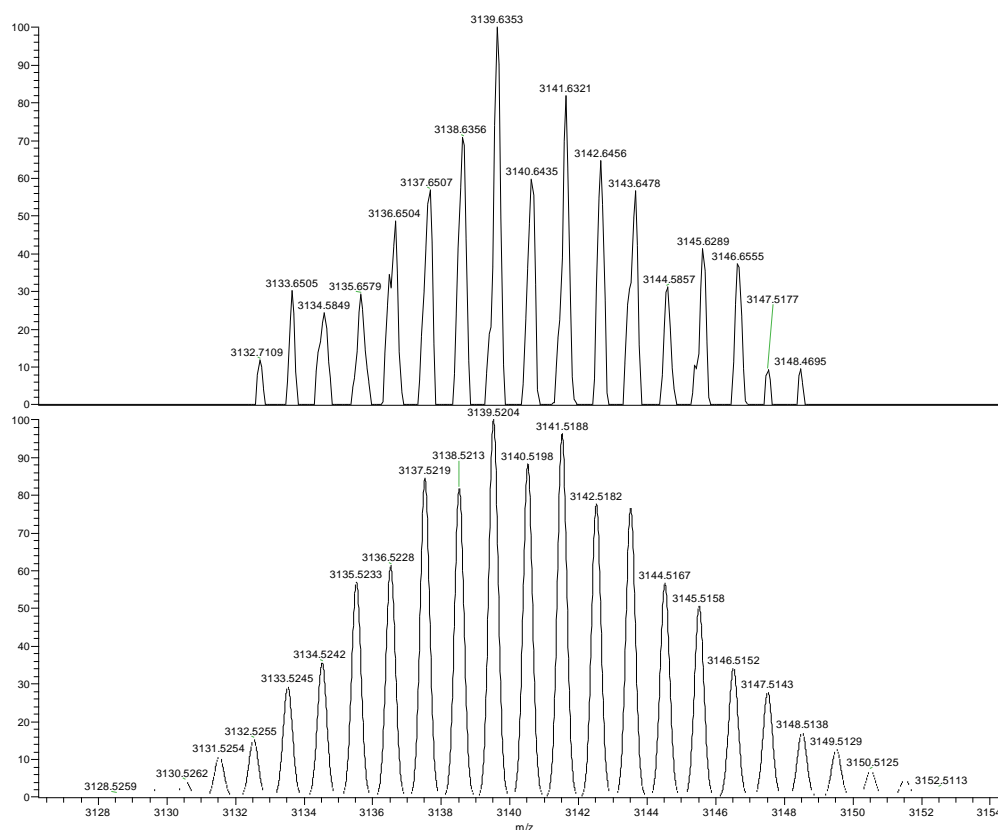

**Figure S38.** Measured (top) and simulated (bottom) spectrum of the fragment  $[K_2\text{crypt}_1\text{Zn}_6\text{Pb}_3\text{Bi}_8]^-$ .

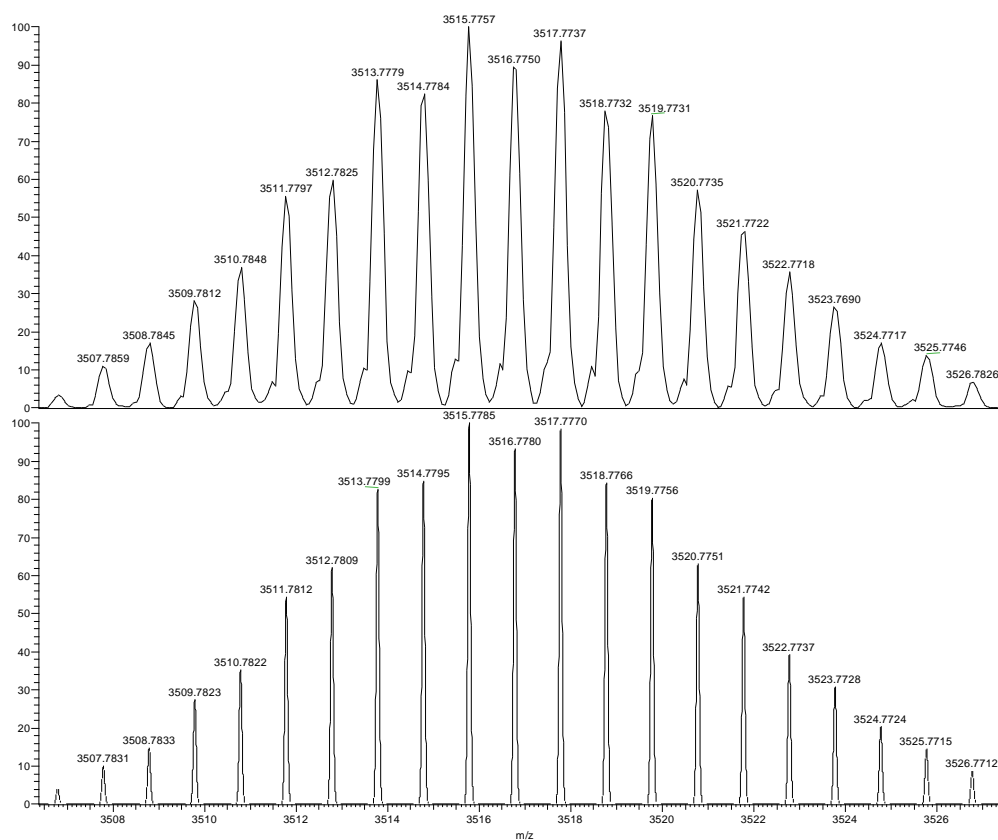

**Figure S39.** Measured (top) and simulated (bottom) spectrum of the fragment  $[K_2\text{crypt}_2\text{Zn}_6\text{Pb}_3\text{Bi}_8]^-$ .

### 5. Energy dispersive X-ray spectroscopy (EDX analyses)

EDX analyses were performed to check the elemental compositions of **1 - 4**; these could not be derived from the XRD experiments since Pb<sup>-</sup> and Bi atoms are not distinguishable with certainty due to the very similar electron density. The EDX analyses were carried out using an EDX-device Voyager 4.0 of Noran Instruments coupled with an electron microscope CamScan CS 4DV. Data acquisition was performed with an acceleration voltage of 20 kV and 100 s accumulation time. The radiation emitted by the atoms was analyzed: Pb-L, Bi-L, K-K, Zn-K, Ni-K (Table S2). For the analyses, multiple single crystals or fragments from the as-prepared K(Pb,Bi)<sub>2</sub> phase were used and the data recorded both: various times on one single crystal/fragment and various times on other single crystals/fragments.

**Table S2.** EDX analysis of the as-prepared K(Pb,Bi)<sub>2</sub> phase, **1, 2, 3** and **4** (Bi, Pb, K, Ni, Zn).

| Element                                 | k-ratio | ZAF   | Atom % | Atomic ratio observed (calc) | Element wt % | wt % Err. (1-sigma) |
|-----------------------------------------|---------|-------|--------|------------------------------|--------------|---------------------|
| <b>K(Pb,Bi)<sub>2</sub> as prepared</b> |         |       |        |                              |              |                     |
| K-K                                     | 0.0528  | 1.588 | 32.77  | 1.8 +/- 0.0 (2)              | 8.39         | +/- 0.13 (2%)       |
| Pb-L                                    | 0.3979  | 1.041 | 30.56  | 1.7 +/- 0.2 (2)              | 41.44        | +/- 3.86 (9%)       |
| Bi-L                                    | 0.4835  | 1.038 | 36.68  | 2.0 +/- 0.1 (2)              | 50.17        | +/- 2.38 (5%)       |
| Total                                   |         |       | 100    | 5.5 (6)                      | 100          |                     |
| <b>1</b>                                |         |       |        |                              |              |                     |
| K-K                                     | 0.0537  | 1.566 | 39.06  | 2.5 +/- 0.2 (2)              | 10.00        | +/- 0.60 (6%)       |
| Pb-L                                    | 0.2762  | 1.047 | 29.69  | 1.9 +/- 0.1 (2)              | 40.25        | +/- 1.60 (4%)       |
| Bi-L                                    | 0.5583  | 1.043 | 31.25  | 2.0 +/- 0.2 (2)              | 42.75        | +/- 3.73 (8%)       |
| Total                                   |         |       | 100    | 6.4 (6)                      | 100          |                     |
| <b>2</b>                                |         |       |        |                              |              |                     |
| K-K                                     | 0.0542  | 1.219 | 22.58  | 2.8 +/- 0.3 (3)              | 5.32         | +/- 0.60 (11%)      |
| Pb-L                                    | 0.4739  | 1.349 | 19.35  | 2.4 +/- 0.1 (2)              | 57.22        | +/- 1.60 (3%)       |
| Bi-L                                    | 0.3762  | 1.033 | 58.06  | 7.2 +/- 0.7 (7)              | 37.46        | +/- 3.73 (10%)      |
| Total                                   |         |       | 100    | 12.4 (12)                    | 100          |                     |
| <b>3</b>                                |         |       |        |                              |              |                     |
| K-K                                     | 0.0238  | 1.586 | 15.79  | 2.6 +/- 0.1 (3)              | 3.77         | +/- 0.21 (6%)       |
| Ni-K                                    | 0.0517  | 0.821 | 11.83  | 2.0 +/- 0.1 (2)              | 4.24         | +/- 0.28 (7%)       |
| Pb-L                                    | 0.4669  | 1.037 | 38.25  | 6.5 +/- 0.3 (7)              | 48.41        | +/- 2.47 (5%)       |
| Bi-L                                    | 0.4219  | 1.033 | 34.13  | 5.7 +/- 0.3 (5)              | 43.57        | +/- 2.65 (6%)       |
| Total                                   |         |       | 100    | 16.8 (17)                    | 100          |                     |
| <b>4</b>                                |         |       |        |                              |              |                     |
| K-K                                     | 0.0477  | 1.555 | 20.64  | 4.1 +/- 0.5 (4)              | 7.42         | +/- 0.83 (11%)      |
| Zn-K                                    | 0.1575  | 0.826 | 28.82  | 6.0 +/- 0.8 (6)              | 13.01        | +/- 1.82 (14%)      |
| Pb-L                                    | 0.1974  | 1.088 | 14.85  | 3.1 +/- 0.7 (3)              | 21.47        | +/- 4.70 (22%)      |
| Bi-L                                    | 0.5360  | 1.084 | 36.09  | 7.5 +/- 0.7 (8)              | 58.10        | +/- 5.62 (10%)      |
| Total                                   |         |       | 100    | 20.7 (21)                    | 100          |                     |

## 6. Powder X-ray diffraction

The as-prepared  $\text{K}(\text{Bi,Pb})_2$  phase was characterized via its X-ray powder diffraction pattern, measured on a Panalytical X'Pert Pro PW3040/60, equipped with  $\text{Cu-K}\alpha$  radiation under anaerobic conditions. Measurements under air failed in that the observed reflections could be assigned to the main group metal oxides. Figure S40 provides comparisons with the literature single crystals data of  $\text{K}(\text{Pb,Bi})_2$ <sup>5a</sup> and  $\text{KBi}_2$ <sup>5b</sup>.

a)

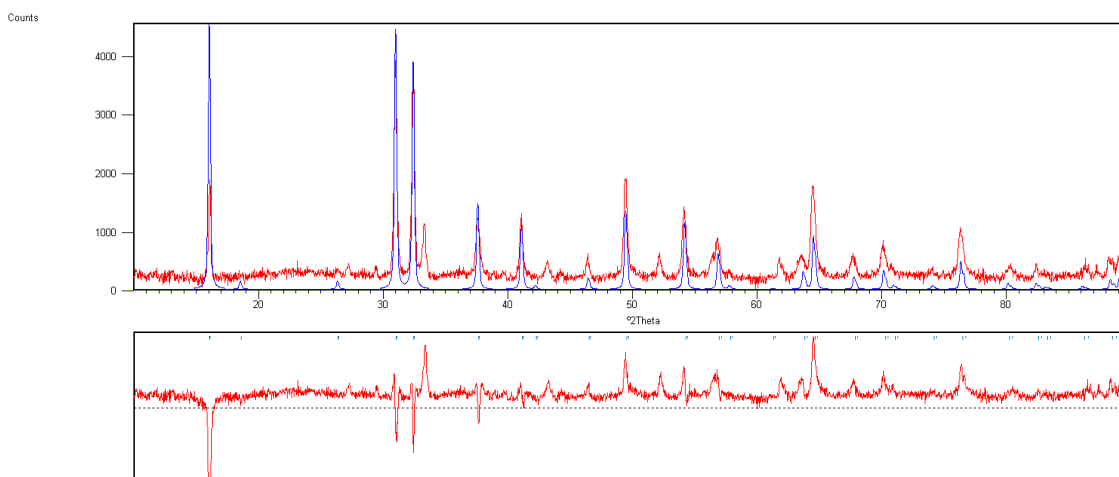

b)

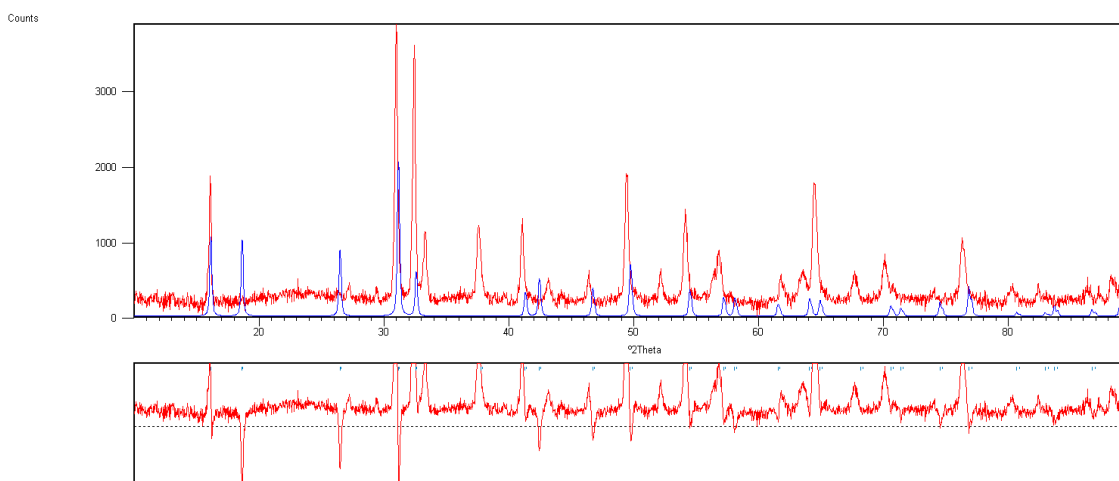

**Figure S40.** Comparison of the powder X-ray diffraction (PXRD) diagram of the as-prepared "KPbBi" phase (red lines) with PXRD simulations of single crystals data (blue lines) of  $\text{K}(\text{Pb,Bi})_2$ <sup>5a</sup> (top) and  $\text{KBi}_2$ <sup>5b</sup> (bottom). The difference diagrams are given below each comparison.



The comparisons show a good fit with  $K(\text{Pb},\text{Bi})_2$  from the literature, despite some differences in the intensities. They do not suggest the additional reflections at  $33, 43, 52$  and  $62^\circ$  in  $2\theta$  to derive from  $\text{KBi}_2$ . These might rather derive from traces of the known phase  $\text{Pb}_7\text{Bi}_3$  (Figure S41).<sup>5c</sup>

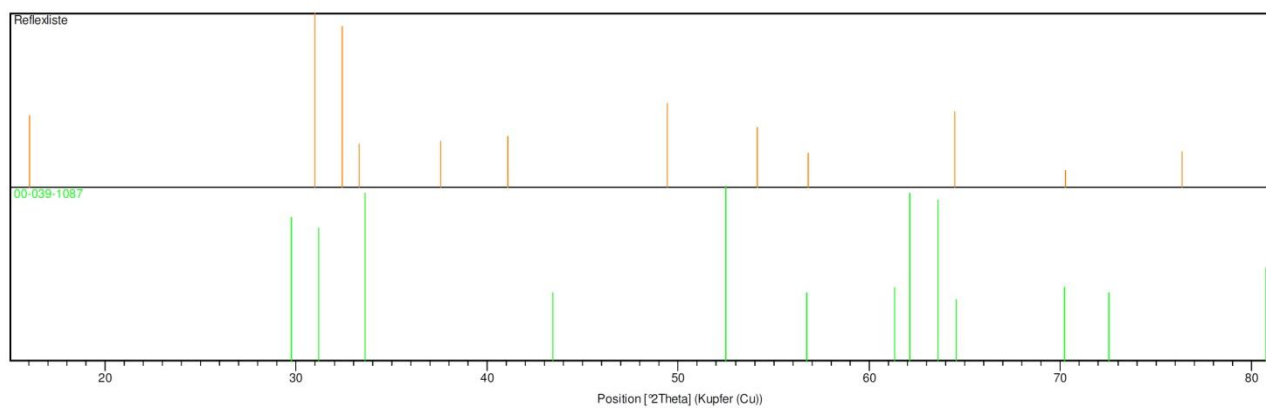

**Figure S41.** Comparison of powder X-ray diffraction data of the as-prepared “KPbBi” phase (top, orange) and those reported for  $\text{Pb}_7\text{Bi}_3$  (bottom, green), indicating a clear mismatch.

## 6. Infrared spectroscopy

The FIR measurements of **3** and **4** (in transmission, Figures S42 and S43) were performed on a TENSOR 37 FT-IR spectrometer (Bruker). The samples were placed between two polyethylene pellets as a nujol suspension.

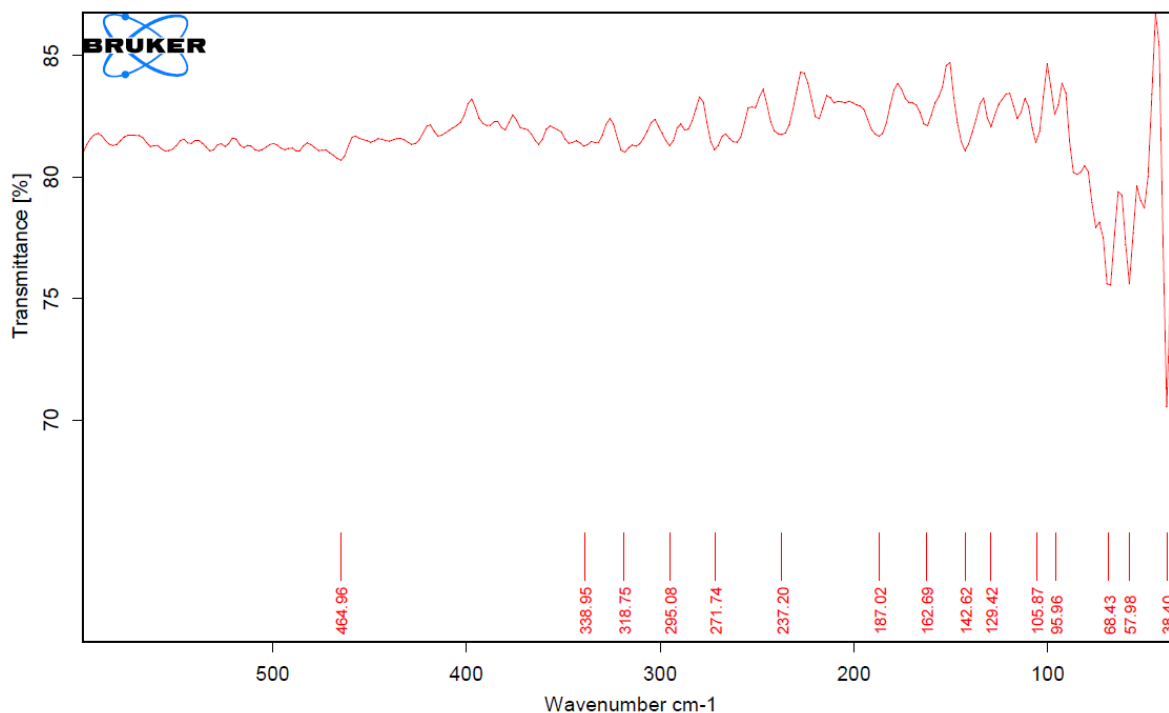

Figure S42. Infrared spectrum of single-crystalline **3**.

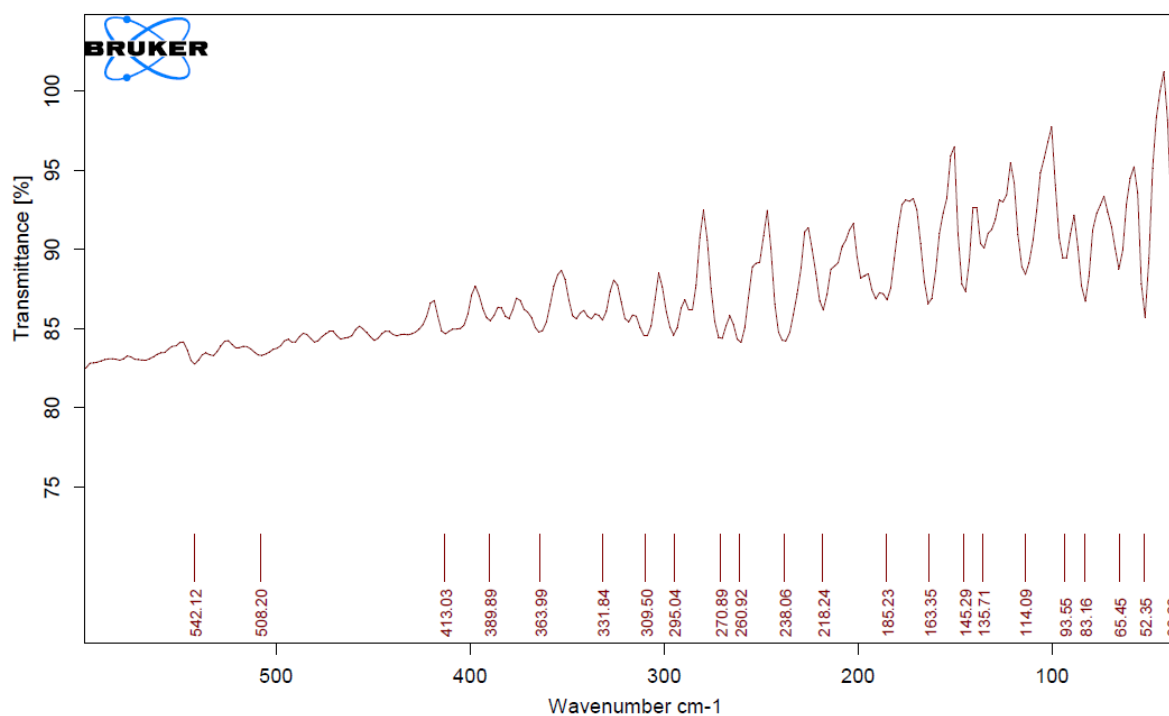

Figure S43. Infrared spectrum of single-crystalline **4**.

## 7. Methods of the quantum chemical investigations

DFT Calculations were done with the program system TURBOMOLE<sup>6</sup> employing the Becke–Perdew 86 (BP86) functional<sup>7</sup> with def2-TZVP bases<sup>8</sup> and respective fitting bases<sup>9</sup> for the evaluation of the Coulomb matrix. Effective core potentials (ECPs) were used for Sn (ECP-28), Pb (ECP-60) and Bi atoms (ECP-60).<sup>10</sup> Counter ions were modeled by the COSMO model with default parameters.<sup>11</sup> Figures S44 and S45 show the structures of the most stable isomers of the calculated species  $[\text{T}_2\text{Bi}_2]^{2-}$ ,  $[\text{T}_7\text{Bi}_2]^{2-}$ ,  $[\text{Ni}_2\text{T}_7\text{Bi}_5]^{3-}$  and  $[\text{Zn}_6\text{T}_3\text{Bi}_{11}]^{4-}$  (T = Pb, Sn) along with their total energies (1 a.u. = 1 Hartree = 2625.47 kJ·mol<sup>-1</sup>) and dielectric contributions (dc), to be subtracted for consideration of the interaction of the anion with the model dielectric medium; energies of Pb or Sn atoms are -193.0064585173 a.u. (dc -0.0049350325 a.u.) or -214.3894882622 a.u. (dc -0.0032484925 a.u.), respectively for the same methods. Calculated distances are provided in Table S4.

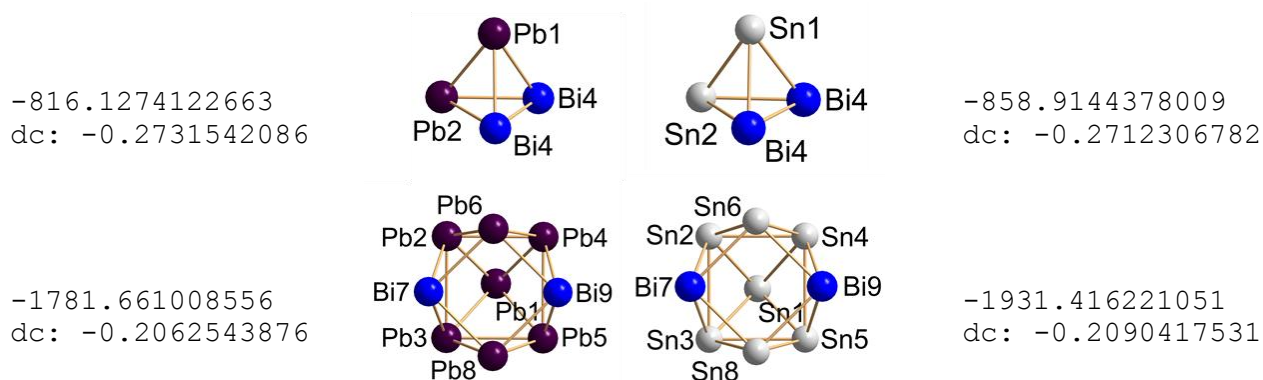

**Figure S44.** Molecular structure of the most stable isomers of  $[\text{T}_2\text{Bi}_2]^{2-}$  and  $[\text{T}_7\text{Bi}_2]^{2-}$  (T = Pb: left, T = Sn: right) along with their total energies and dielectric contributions (dc) [a.u.].

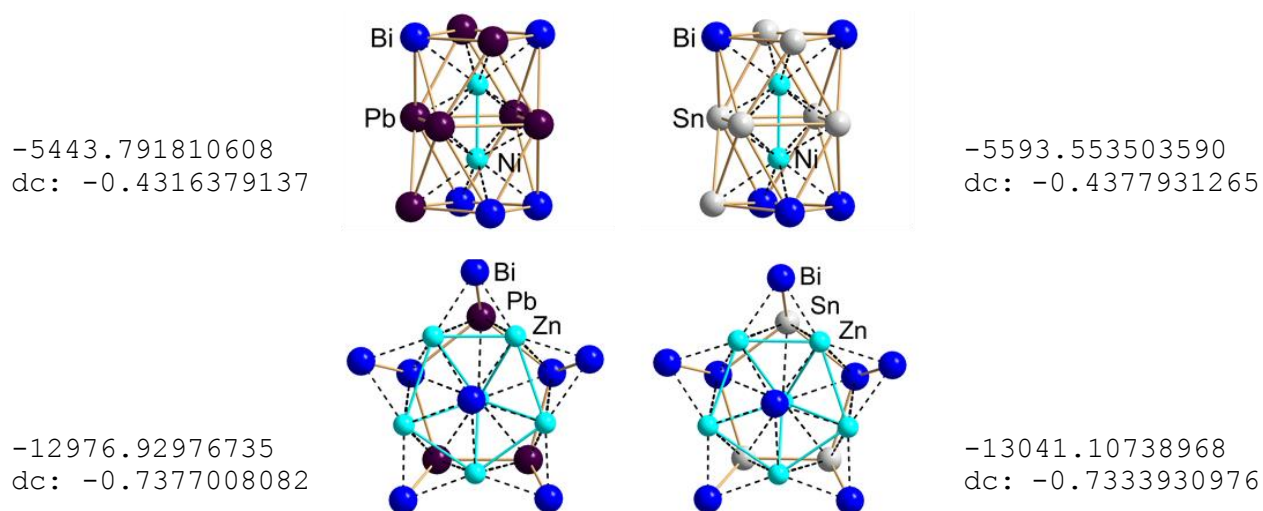

**Figure S45.** Molecular structure of the most stable isomers of  $[\text{Ni}_2\text{T}_7\text{Bi}_5]^{3-}$  and  $[\text{Zn}_6\text{T}_3\text{Bi}_{11}]^{4-}$  (T = Pb: left, T = Sn: right) along with their total energies and dielectric contributions (dc) [a.u.].

**Table S4.** Calculated distances in the anions shown in figures S35 and S36 [pm].

| $[\text{Pb}_2\text{Bi}_2]^{2-}$            | $[\text{Sn}_2\text{Bi}_2]^{2-}$            | $[\text{Pb}_7\text{Bi}_2]^{2-}$               | $[\text{Sn}_7\text{Bi}_2]^{2-}$               |
|--------------------------------------------|--------------------------------------------|-----------------------------------------------|-----------------------------------------------|
| Bi3-Bi4 302.58                             | Sn1-Sn2 294.73                             | Pb1-Pb2 311.85                                | Sn1-Sn2 298.47                                |
| Pb2-Bi4 307.76                             | Sn2-Bi4 300.93                             | Pb1-Pb3 311.86                                | Sn1-Sn3 298.48                                |
| Pb1-Bi4 307.96                             | Sn1-Bi4 300.94                             | Pb8-Bi9 311.98                                | Sn1-Sn5 298.73                                |
| Pb1-Bi3 308.12                             | Sn1-Bi3 301.14                             | Pb6-Bi9 311.99                                | Sn1-Sn4 298.74                                |
| Pb2-Bi3 308.22                             | Sn2-Bi3 301.16                             | Bi7-Pb8 312.12                                | Sn2-Sn6 303.94                                |
| Pb1-Pb2 309.38                             | Bi3-Bi4 302.74                             | Pb6-Bi7 312.14                                | Sn3-Sn8 303.95                                |
|                                            |                                            | Pb1-Pb5 312.35                                | Sn4-Sn6 304.22                                |
|                                            |                                            | Pb1-Pb4 312.36                                | Sn5-Sn8 304.24                                |
|                                            |                                            | Pb2-Bi9 313.89                                | Sn6-Bi9 305.18                                |
|                                            |                                            | Pb3-Bi9 313.89                                | Sn8-Bi9 305.18                                |
|                                            |                                            | Pb4-Bi7 313.92                                | Bi7-Sn8 305.24                                |
|                                            |                                            | Pb5-Bi7 313.92                                | Sn6-Bi7 305.25                                |
|                                            |                                            | Pb2-Pb6 318.84                                | Sn2-Bi9 305.71                                |
|                                            |                                            | Pb3-Pb8 318.84                                | Sn3-Bi9 305.71                                |
|                                            |                                            | Pb4-Pb6 319.34                                | Sn4-Bi7 305.80                                |
|                                            |                                            | Pb5-Pb8 319.35                                | Sn5-Bi7 305.81                                |
|                                            |                                            | Pb2-Pb4 331.47                                | Sn3-Sn5 315.91                                |
|                                            |                                            | Pb3-Pb5 331.47                                | Sn2-Sn4 315.92                                |
|                                            |                                            | Pb4-Pb5 349.28                                | Sn4-Sn5 337.98                                |
|                                            |                                            | Pb2-Pb3 350.50                                | Sn2-Sn3 338.53                                |
|                                            |                                            | Pb                                            |                                               |
| $[\text{Ni}_2\text{Pb}_7\text{Bi}_5]^{3-}$ | $[\text{Ni}_2\text{Sn}_7\text{Bi}_5]^{3-}$ | $[\text{Zn}_6\text{Pb}_3\text{Bi}_{11}]^{4-}$ | $[\text{Zn}_6\text{Sn}_3\text{Bi}_{11}]^{4-}$ |
| Ni-Ni 252.40                               | Ni-Ni 247.66                               | Zn-Zn 292.22-329.39                           | Zn-Zn 286.87-325.83                           |
| Ni-Pb 272.82-279.97                        | Ni-Sn 263.97-270.00                        | Zn-Pb 307.00-351.35                           | Zn-Sn 297.82-346.32                           |
| Ni-Bi 266.73-274.42                        | Ni-Bi 270.86-272.52                        | Zn-Bi 272.91-344.24                           | Zn-Bi 272.90-343.95                           |
| Pb-Pb 340.10-349.63                        | Sn-Sn 328.30-338.04                        | Pb-Pb 324.84                                  | Sn-Sn 309.78                                  |
| Bi-Bi 305.33-305.34                        | Bi-Bi 305.62-305.63                        | Bi-Bi 303.09-303.10                           | Bi-Bi 303.96-304.16                           |
| Pb-Bi 310.06-347.29                        | Sn-Bi 303.79-343.17                        | Pb-Bi 305.93-321.07                           | Sn-Bi 298.03-314.28                           |

For further insight in the bonding situation, localized molecular orbitals<sup>13</sup> (LMOs, Table S5) and bond indices<sup>14</sup> (Table S6) were generated and analyzed. For illustration of the slight differences between Pb and Sn compounds, surface potentials were calculated for the Ni cluster in compound **3** as an example (Figure S46). The contour plot was generated with gOpenMol.<sup>12</sup>

**Table S5.** Localized molecular orbitals (LMOs) of  $[\text{Ni}_2\text{Pb}_7\text{Bi}_5]^{3-}$  and  $[\text{Zn}_6\text{Pb}_3\text{Bi}_{11}]^{4-}$  characterized by the diagonal element of the Fock matrix in LMO basis,  $\text{diag}(\text{fock})$ , and the dominant atom contributions from a Mulliken analysis.

| $[\text{Ni}_2\text{Pb}_7\text{Bi}_5]^{3-}$    |                                                 |            |            |            |
|-----------------------------------------------|-------------------------------------------------|------------|------------|------------|
| Bi3-Pb-ring                                   |                                                 |            |            |            |
| No. ( $\text{diag}(\text{fock})$ )            | dominant contributions (from Mulliken analysis) |            |            |            |
| 141 (-0.243)                                  | 6bi 0.949                                       | 8bi 0.908  |            |            |
| 142 (-0.243)                                  | 6bi 0.949                                       | 9bi 0.908  |            |            |
| 148 (-0.215)                                  | 8bi 1.202                                       | 11pb 0.617 |            |            |
| 149 (-0.215)                                  | 9bi 1.202                                       | 11pb 0.617 |            |            |
| Bi2-Pb2-ring                                  |                                                 |            |            |            |
| 150 (-0.212)                                  | 4bi 1.170                                       | 7pb 0.640  |            |            |
| 151 (-0.212)                                  | 4bi 1.171                                       | 10pb 0.640 |            |            |
| 153 (-0.209)                                  | 12bi 1.174                                      | 10pb 0.638 |            |            |
| 154 (-0.209)                                  | 12bi 1.175                                      | 7pb 0.638  |            |            |
| Bi2Pb2-ring to Pb4-ring                       |                                                 |            |            |            |
| 147 (-0.216)                                  | 12bi 1.056                                      | 1pb 0.203  | 5pb 0.203  | 13ni 0.161 |
| 152 (-0.212)                                  | 4bi 1.105                                       | 2pb 0.249  | 3pb 0.248  | 13ni 0.143 |
| 144 (-0.223)                                  | 1pb 0.607                                       | 3pb 0.600  | 7pb 0.345  | 13ni 0.192 |
| 145 (-0.223)                                  | 5pb 0.608                                       | 2pb 0.600  | 10pb 0.345 | 13ni 0.191 |
| Bi3Pb-ring to Pb4-ring                        |                                                 |            |            |            |
| 143 (-0.226)                                  | 6bi 0.916                                       | 3pb 0.385  | 2pb 0.385  | 14ni 0.180 |
| 146 (-0.222)                                  | 5pb 0.593                                       | 1pb 0.593  | 11pb 0.341 | 14ni 0.183 |
| 155 (-0.201)                                  | 9bi 1.113                                       | 5pb 0.259  | 2pb 0.185  | 11pb 0.128 |
| 156 (-0.201)                                  | 8bi 1.113                                       | 1pb 0.260  | 3pb 0.185  | 11pb 0.128 |
| Ni (d)                                        |                                                 |            |            |            |
| 157 (-0.187)                                  | 14ni 1.745                                      |            |            |            |
| 158 (-0.187)                                  | 14ni 1.745                                      |            |            |            |
| 159 (-0.186)                                  | 14ni 1.895                                      |            |            |            |
| 160 (-0.184)                                  | 13ni 1.732                                      |            |            |            |
| 161 (-0.183)                                  | 13ni 1.873                                      |            |            |            |
| 162 (-0.181)                                  | 14ni 1.853                                      |            |            |            |
| 163 (-0.180)                                  | 13ni 1.824                                      |            |            |            |
| 164 (-0.180)                                  | 13ni 1.824                                      |            |            |            |
| 139 (-0.323)                                  | 14ni 1.939                                      |            |            |            |
| 140 (-0.292)                                  | 13ni 1.930                                      |            |            |            |
| $[\text{Zn}_6\text{Pb}_3\text{Bi}_{11}]^{4-}$ |                                                 |            |            |            |
| Outer Bi to Pb/Bi/Zn                          |                                                 |            |            |            |
| 212 (-0.219)                                  | 13bi 1.257                                      | 4zn 0.701  |            |            |
| 213 (-0.218)                                  | 13bi 1.270                                      | 3zn 0.680  |            |            |
| 198 (-0.233)                                  | 8bi 0.950                                       | 13bi 0.947 |            |            |
| 215 (-0.204)                                  | 14bi 1.177                                      | 7pb 0.672  |            |            |
| 202 (-0.225)                                  | 14bi 1.220                                      | 4zn 0.711  |            |            |
| 203 (-0.225)                                  | 14bi 1.215                                      | 5zn 0.714  |            |            |
| 217 (-0.198)                                  | 15bi 1.191                                      | 10pb 0.656 |            |            |
| 210 (-0.220)                                  | 15bi 1.230                                      | 2zn 0.723  |            |            |
| 200 (-0.228)                                  | 15bi 1.205                                      | 3zn 0.749  |            |            |
| 216 (-0.198)                                  | 16bi 1.192                                      | 11pb 0.658 |            |            |
| 209 (-0.221)                                  | 16bi 1.227                                      | 2zn 0.734  |            |            |
| 201 (-0.227)                                  | 16bi 1.213                                      | 1zn 0.743  |            |            |
| 211 (-0.220)                                  | 17bi 1.253                                      | 5zn 0.706  |            |            |
| 214 (-0.218)                                  | 17bi 1.277                                      | 1zn 0.671  |            |            |
| 197 (-0.233)                                  | 9bi 0.950                                       | 17bi 0.946 |            |            |
| Pb/Bi-Ring                                    |                                                 |            |            |            |
| 204 (-0.225)                                  | 10pb 0.692                                      | 11pb 0.685 | 2zn 0.386  | 6zn 0.198  |
| 205 (-0.224)                                  | 9bi 1.111                                       | 7pb 0.524  | 5zn 0.176  | 6zn 0.127  |
| 206 (-0.223)                                  | 8bi 1.111                                       | 7pb 0.528  | 4zn 0.169  | 6zn 0.130  |
| 207 (-0.223)                                  | 9bi 1.109                                       | 11pb 0.523 | 6zn 0.156  | 1zn 0.119  |
| 208 (-0.222)                                  | 8bi 1.115                                       | 10pb 0.523 | 6zn 0.145  | 3zn 0.123  |
| 12Bi to Zn-Ring                               |                                                 |            |            |            |
| 199 (-0.232)                                  | 12bi 1.134                                      | 1zn 0.487  | 2zn 0.169  |            |
| 195 (-0.239)                                  | 12bi 1.090                                      | 4zn 0.410  | 5zn 0.387  |            |
| 196 (-0.234)                                  | 12bi 1.124                                      | 3zn 0.472  | 2zn 0.211  |            |

**Table S6.** Bond indices of  $[\text{Ni}_2\text{Pb}_7\text{Bi}_5]^{3-}$  and  $[\text{Zn}_6\text{Pb}_3\text{Bi}_{11}]^{4-}$  and analogous Sn compounds.

| $[\text{Ni}_2\text{X}_7\text{Bi}_5]^{3-}$ | X=Pb    | X=Sn    | $[\text{Zn}_6\text{X}_3\text{Bi}_{11}]^{4-}$ | X=Pb    | X=Sn    |
|-------------------------------------------|---------|---------|----------------------------------------------|---------|---------|
| Bi3-X-ring                                |         |         | Outer Bi to Bi/X                             |         |         |
| Bi8-Bi6                                   | 0.89118 | 0.87858 | Bi13-Bi8                                     | 0.94635 | 0.93213 |
| Bi9-Bi6                                   | 0.89121 | 0.87861 | Bi14-X7                                      | 0.89390 | 0.93769 |
| X11-Bi9                                   | 0.80761 | 0.79500 | Bi15-X10                                     | 0.84567 | 0.88289 |
| X11-Bi8                                   | 0.80752 | 0.79496 | Bi16-X11                                     | 0.84881 | 0.88499 |
| Bi2-X2-ring                               |         |         | Bi17-Bi9                                     | 0.94650 | 0.93546 |
| X7-Bi4                                    | 0.81317 | 0.80325 | Outer Bi to Zn                               |         |         |
| X10-Bi4                                   | 0.81334 | 0.80308 | Bi13-Zn3                                     | 0.78206 | 0.79259 |
| Bi12-X10                                  | 0.81571 | 0.79856 | Bi13-Zn4                                     | 0.78675 | 0.79779 |
| Bi12-X7                                   | 0.81575 | 0.79849 | Bi14-Zn4                                     | 0.80229 | 0.79483 |
| X4-ring (middle)                          |         |         | Bi14-Zn5                                     | 0.80075 | 0.79247 |
| X3-X1                                     | 0.33690 | 0.30669 | Bi15-Zn2                                     | 0.81886 | 0.82223 |
| X3-X2                                     | 0.27304 | 0.25666 | Bi15-Zn3                                     | 0.84427 | 0.82862 |
| X5-X2                                     | 0.33691 | 0.30673 | Bi16-Zn1                                     | 0.83816 | 0.82508 |
| X5-X1                                     | 0.31486 | 0.27716 | Bi16-Zn2                                     | 0.82365 | 0.82136 |
| Bi3-X-ring to middle X4-ring              |         |         | Bi17-Zn1                                     | 0.78062 | 0.79083 |
| X11-X1                                    | 0.31350 | 0.31963 | Bi17-Zn5                                     | 0.79322 | 0.80324 |
| X11-X5                                    | 0.31360 | 0.31950 | Bi-X-ring                                    |         |         |
| Bi6-X2                                    | 0.30401 | 0.30092 | Bi8-X7                                       | 0.61389 | 0.64628 |
| Bi6-X3                                    | 0.30406 | 0.30106 | X10-Bi8                                      | 0.60334 | 0.62349 |
| Bi8-X1                                    | 0.31533 | 0.30942 | X11-X10                                      | 0.52544 | 0.57330 |
| Bi8-X3                                    | 0.29441 | 0.28857 | X11-Bi9                                      | 0.60282 | 0.62201 |
| Bi9-X2                                    | 0.29438 | 0.28877 | Bi9-X7                                       | 0.60514 | 0.64083 |
| Bi9-X5                                    | 0.31527 | 0.30926 | Bi12 to Zn-ring                              |         |         |
| Bi2-X2-ring to middle X4-ring             |         |         | Bi12-Zn1                                     | 0.58727 | 0.57301 |
| X0-X2                                     | 0.31592 | 0.32039 | Bi12-Zn2                                     | 0.44921 | 0.49413 |
| X10-X5                                    | 0.30157 | 0.30143 | Bi12-Zn3                                     | 0.57815 | 0.57073 |
| Bi12-X1                                   | 0.34348 | 0.33023 | Bi12-Zn4                                     | 0.54317 | 0.55095 |
| Bi12-X5                                   | 0.34334 | 0.33015 | Bi12-Zn5                                     | 0.52961 | 0.54934 |
| Bi4-X2                                    | 0.33930 | 0.32297 | Zn-ring                                      |         |         |
| Bi4-X3                                    | 0.33899 | 0.32266 | Zn2-Zn1                                      | 0.17421 | 0.18727 |
| X7-X1                                     | 0.30141 | 0.30125 | Zn3-Zn2                                      | 0.20000 | 0.20035 |
| X7-X3                                     | 0.31601 | 0.32069 | Zn4-Zn3                                      | 0.13033 | 0.14346 |
| Ni to neighbors                           |         |         | Zn5-Zn1                                      | 0.13782 | 0.14824 |
| Ni13-X1                                   | 0.37370 | 0.38508 | Zn5-Zn4                                      | 0.21537 | 0.22011 |
| Ni13-X2                                   | 0.39330 | 0.40106 | Zn-ring to Bi/X-ring                         |         |         |
| Ni13-X3                                   | 0.39335 | 0.40105 | Bi9-Zn1                                      | 0.21527 | 0.20332 |
| Ni13-X5                                   | 0.37352 | 0.38513 | X11-Zn1                                      | 0.18150 | 0.19946 |
| Ni13-X7                                   | 0.33374 | 0.35314 | X10-Zn2                                      | 0.35960 | 0.35020 |
| Ni13-Bi4                                  | 0.41440 | 0.46681 | X11-Zn2                                      | 0.35291 | 0.34441 |
| Ni13-X10                                  | 0.33386 | 0.35303 | X10-Zn3                                      | 0.18897 | 0.20433 |
| Ni13-Bi12                                 | 0.41753 | 0.47653 | Bi8-Zn3                                      | 0.21941 | 0.20750 |
| Ni14-X1                                   | 0.37618 | 0.39659 | X7-Zn4                                       | 0.21776 | 0.24054 |
| Ni14-X2                                   | 0.39045 | 0.38340 | Bi8-Zn4                                      | 0.25904 | 0.25109 |
| Ni14-X3                                   | 0.39036 | 0.38340 | X7-Zn5                                       | 0.22459 | 0.24150 |
| Ni14-X5                                   | 0.37623 | 0.39660 | Bi9-Zn5                                      | 0.26315 | 0.24895 |
| Ni14-Bi8                                  | 0.41814 | 0.45424 | Bi/X-ring to Zn6                             |         |         |
| Ni14-Bi6                                  | 0.41386 | 0.42545 | Bi9-Zn6                                      | 0.18470 | 0.18828 |
| Ni14-Bi9                                  | 0.41814 | 0.45427 | Bi8-Zn6                                      | 0.17258 | 0.17297 |
| Ni14-X11                                  | 0.32584 | 0.35531 |                                              |         |         |
| Ni-Ni                                     |         |         |                                              |         |         |
| Ni14-Ni13                                 | 0.15809 | 0.25181 |                                              |         |         |

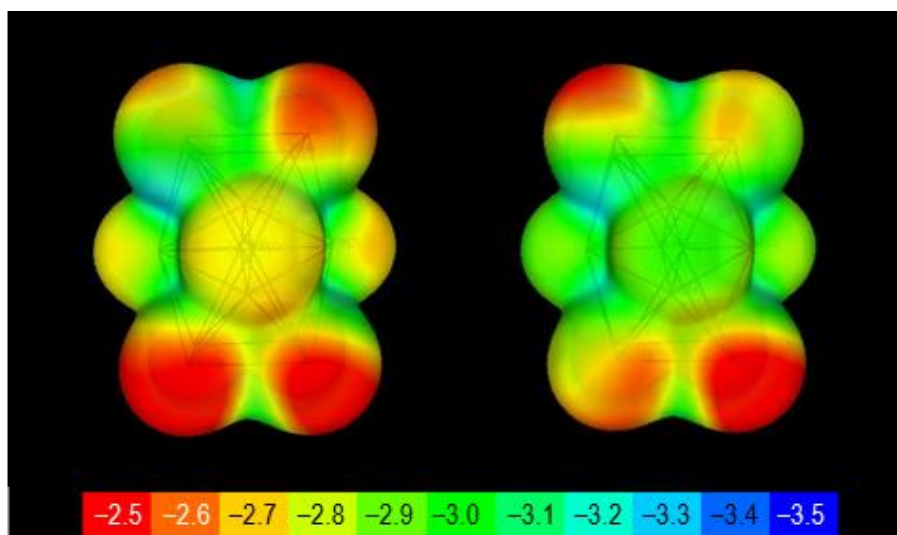

**Figure S46.** Illustration of electrostatic potentials  $U$  of the Ni/Pb/Bi anion in **3** (left) and its Ni/Sn/Bi analogue (right) from  $U = -0.25$  a.u. (red) to  $U = -0.35$  a.u. (blue), drawn as isodensity surfaces at  $0.08 \text{ e} \cdot \text{\AA}^{-3}$ . Warmer colors refer to lower surface potentials ( $-2.5$  to  $-3.0$ , red to green), colder colors refer to higher surface potentials ( $-3.0$  to  $-3.5$ , green to dark blue).

## 8. References for the supplementary information

1. (a) [2.2.2]crypt: 4,7,13,16,21,24-Hexaoxa-1,10-diazabicyclo[8.8.8]hexacosane; (b) S. Otsuka and M. Rossi, *J. Chem. Soc. (A)*, 1968, 2630.
2. E. N. Esentruk, J. Fettinger and B. Eichhorn, *J. Am. Chem. Soc.*, 2006, **128**, 9178.
3. (a) G.M. Sheldrick, SHELXL97, Program for the refinement of crystal structures, Universität Göttingen (1997). (b) DIAMOND Crystal and Molecular Structure Visualization, *Scientific Computing World*, 2002, **63**, 19. (c) H. D. Flack, *Acta Cryst.*, 1983, **A39**, 876. (d) A. L. Spek, *Acta Cryst.*, 1990, **A46**, c34.
4. S. C. Critchlow and J. D. Corbett, *Inorg. Chem.*, 1982, **21**, 3286.
5. (a) S. Ponou, N. Müller, T. F. Fässler and U. Häussermann, *Inorg. Chem.*, 2005, **44**, 7423; (b) F. Emmerling, N. Längin, D. Petri, M. Kroeker, C. Röhr, *Z. Anorg. Allg. Chem.* **2004**, **630**, 171; (c) S. E. Rasmussen and B. Lundtoft, *Powder Diffraction*, 1987, **2**, 28.
6. TURBOMOLE Version 6.2, (c) TURBOMOLE GmbH 2011. TURBOMOLE is a development of University of Karlsruhe and Forschungszentrum Karlsruhe 1989-2007, TURBOMOLE GmbH since 2007.
7. (a) A. D. Becke, *Phys. Rev. A*, 1988, **38**, 3098; (b) J. P. Perdew, *Phys. Rev. B*, 1996, **33**, 8822.
8. F. Weigend and R. Ahlrichs, *Phys. Chem. Chem. Phys.*, 2005, **7**, 3297.
9. F. Weigend, *Phys. Chem. Chem. Phys.*, 2006, **8**, 1057.

10. H. Stoll, B. Metz and M. Dolg, *J. Comput. Chem.*, 2002, **23**, 767.
11. A. Klamt and G. Schürmann *J. Chem. Soc. Perkin Trans.*, 1993, **2**, 799.
12. D. L. Bergman, L. Laaksonen and A. Laaksonen, *J. Mol. Graph. Model.*, 1997, **15**, 301.
13. J. Pipek and G. Mezey, *J. Chem. Phys.*, 1990, **90**, 4916.
14. I. Mayer, *Chem. Phys. Lett.*, 1988, **97**, 270.
